1 **Genetic and pharmacological reduction of CDK14 mitigates synucleinopathy**

2

3 **Authors:** Jean-Louis A. Parmasad<sup>1,2,†</sup>, Konrad M. Ricke<sup>1,2,3†</sup>, Morgan G. Stykel<sup>4</sup>, Brodie  
4 Buchner-Duby<sup>4</sup>, Eric Lian<sup>5,6</sup>, Benjamin Nguyen<sup>1,2,3</sup>, Nathalie A. Lengacher<sup>1,3,5</sup>, Haley M.  
5 Geertsma<sup>1,2,3</sup>, Amanda Bruce<sup>1,2</sup>, Steve M. Callaghan<sup>1,2,3</sup>, Alvin Joselin<sup>7</sup>, Julianna J.  
6 Tomlinson<sup>1,3,5</sup>, Michael G. Schlossmacher<sup>1,3,5</sup>, William L. Stanford<sup>2,5,6</sup>, Patrik Brundin<sup>8</sup>, Scott D.  
7 Ryan<sup>4</sup>, and Maxime W.C. Rousseaux<sup>1,2,3,6,\*</sup>

8

9

10

11

12

13 **Affiliations:**

14 <sup>1</sup> University of Ottawa Brain and Mind Research Institute, Ottawa, ON

15 <sup>2</sup> Department of Cellular and Molecular Medicine, University of Ottawa, Ottawa, ON

16 <sup>3</sup> Aligning Science Across Parkinson's (ASAP) Collaborative Research Network, Chevy Chase,  
17 MD

18 <sup>4</sup> Department of Molecular and Cellular Biology, University of Guelph, Guelph, ON

19 <sup>5</sup> Program in Neuroscience, Ottawa Hospital Research Institute, Ottawa, ON

20 <sup>6</sup> Ottawa Institute for Systems Biology, University of Ottawa, Ottawa, ON

21 <sup>7</sup> Hotchkiss Brain Institute, Department of Clinical Neurosciences, University of Calgary,  
22 Calgary, AB

23 <sup>8</sup> Parkinson's Disease Center, Department of Neurodegenerative Science, Van Andel Institute,  
24 Grand Rapids, MI

25 <sup>†</sup>Authors contributed equally

26

27 <sup>\*</sup>Corresponding author. Email: [max.rousseau@uottawa.ca](mailto:max.rousseau@uottawa.ca)

28 **One Sentence Summary:**

29 Loss of CDK14 mitigates  $\alpha$ -Synuclein pathology in Parkinson's disease (PD) mouse models and  
30 in human neurons, highlighting CDK14 as a druggable target for the treatment of PD.

31

32 **Abstract:**

33 Parkinson's disease (PD) is a debilitating neurodegenerative disease characterized by the loss of  
34 midbrain dopaminergic neurons (DaNs) and the abnormal accumulation of  $\alpha$ -Synuclein ( $\alpha$ -Syn)  
35 protein. Currently, no treatment can slow nor halt neurodegeneration. Multiplications and  
36 mutations of the  $\alpha$ -Syn gene (*SNCA*) cause PD-associated syndromes and animal models that  
37 overexpress  $\alpha$ -Syn replicate several features of PD. Decreasing total  $\alpha$ -Syn levels, therefore, is an  
38 attractive approach to slow down neurodegeneration in patients with a 'synucleinopathy'. We  
39 previously performed a genetic screen for modifiers of  $\alpha$ -Syn levels, and found CDK14, a kinase  
40 of largely unknown function as a regulator of  $\alpha$ -Syn. To test the potential therapeutic effects of  
41 CDK14 reduction in PD, we decreased Cdk14 in two mouse models of synucleinopathy. We found  
42 that reduction of Cdk14 mitigated neuropathological and neurobehavioral sequelae associated with  
43  $\alpha$ -Syn overexpression. We further validated these findings in PD patient neurons. Finally, we  
44 leveraged the recent discovery of a covalent inhibitor of CDK14 to determine whether this target  
45 is pharmacologically tractable *ex vivo*. We found that in both mouse and human neurons, CDK14  
46 inhibition decreases total and pathologically aggregated  $\alpha$ -Syn. In summary, we suggest that  
47 CDK14 represents a novel therapeutic target for PD-associated synucleinopathy.

48

## 49 INTRODUCTION

50 Parkinson's disease (PD) is a neurodegenerative disease that affects over 10 million individuals  
51 worldwide (1,2). Individuals with PD present with motor symptoms such as bradykinesia, rigidity,  
52 shuffling gait, and resting tremor, as well as non-motor symptoms such as constipation, anosmia  
53 and sleep disturbances (3–5). Neuropathologically, typical PD is characterized by the loss of  
54 dopaminergic neurons (DaNs) in the substantia nigra pars compacta (SN) as well as the  
55 accumulation of  $\alpha$ -synuclein ( $\alpha$ -Syn) containing inclusions termed Lewy bodies and Lewy neurites  
56 (collectively: Lewy pathology) in surviving neurons (6–8). Current treatments address motor  
57 deficits, but are less effective on non-motor aspects of the disease and cannot slow down nor halt  
58 neurodegeneration in PD (9). Therefore, identifying new druggable targets for PD is clearly  
59 warranted. In addition to being abundantly present in Lewy pathology, point mutations and  
60 multiplications in the gene encoding  $\alpha$ -Syn, *SNCA*, underlie monogenic variants of PD (10,11).  
61 Increased levels of *SNCA* mRNA are also observed in laser captured SN DaNs from PD patients  
62 (12), and animal models that overexpress  $\alpha$ -Syn replicate several features of PD (13–15). Thus,  
63 there is a clear link between increased  $\alpha$ -Syn dosage and PD pathogenesis, highlighting a crucial  
64 role of  $\alpha$ -Syn in the manifestation of PD (16–19).

65 Since  $\alpha$ -Syn dosage is linked to PD, decreasing total  $\alpha$ -Syn levels may be a feasible  
66 approach to mitigate neurodegeneration in PD patients, regardless of whether oligomeric or  
67 fibrillar  $\alpha$ -Syn is the toxic culprit. *SncA*-knockout (KO) mice are viable and fertile but display mild  
68 cognitive impairments, suggesting that a modest amount of cerebral  $\alpha$ -Syn is required to  
69 accomplish its physiological role at the synapse (20,21). Titration of excessive  $\alpha$ -Syn levels in a  
70 non-invasive manner would thus be beneficial in treating a chronic neurodegenerative disease like  
71 PD. Specifically, an orally available drug capable of mitigating  $\alpha$ -Syn toxicity could offer a

72 minimally invasive approach, a feature particularly important in treating a chronic illness. A  
73 pooled RNAi screen investigating modifiers of  $\alpha$ -Syn levels identified cyclin-dependent kinase 14  
74 (CDK14, a.k.a. PFTK1) as a robust regulator of  $\alpha$ -Syn in human neurons and *in vivo* (22). CDK14  
75 is a brain expressed protein kinase with a largely unknown biological function (23). Its expression  
76 is upregulated in certain cancers, such as esophageal and colorectal cancer, for which it has  
77 generated attention as a therapeutic target (24,25). In fact, this has led to the recent development  
78 of FMF-04-159-2, a potent, covalent inhibitor of CDK14 (26).

79         Since reducing CDK14 leads to a mild reduction in endogenous  $\alpha$ -Syn levels (22), we  
80 hypothesize that genetic and pharmacological inhibition of CDK14 reduces  $\alpha$ -Syn pathology and  
81 PD-like phenotypes in mice and human cells. To test this hypothesis, we analyzed PD-like features  
82 in two PD mouse models (mice injected with preformed  $\alpha$ -Syn fibrils, and  $\alpha$ -Syn transgenic mice)  
83 with partial or full KO of *Cdk14*. Furthermore, using the recently developed specific CDK14  
84 inhibitor, we tested if the pharmacological inhibition of CDK14 is sufficient to decrease  $\alpha$ -Syn  
85 levels in rodent and human neurons. In summary, we show that decreasing CDK14 prevents  $\alpha$ -Syn  
86 accumulation and ameliorates its downstream pathological consequences.

87

## 88 **RESULTS**

### 89 **CDK14 ablation ameliorates motor impairment and $\alpha$ -Syn pathology in PFF-injected mice**

90 Since PD is a chronic disease, inhibition of a candidate modifier would have to be safe, long term.  
91 We first tested the level of expression and consequence of depletion of *Cdk14* *in vivo*. We found  
92 that *Cdk14* was highly expressed in the brain (**fig. S1A**) and that *Cdk14* nullizygous mice were  
93 viable, fertile, and exhibited normal brain morphology (27). We next asked whether silencing  
94 *Cdk14* is sufficient to mitigate behavioral and histological phenotypes observed in mice injected

95 with pathogenic  $\alpha$ -Syn pre-formed fibrils (mouse PFFs; **Fig. 1A and B; fig. S1B and S2A**). Six  
96 months following intrastriatal injection of  $\alpha$ -Syn PFFs, there is a stereotypic brain-wide  
97 accumulation of pS129  $\alpha$ -Syn – a marker of human synucleinopathies – in addition to SN DaNs  
98 loss and mild motor impairments (28–30). In our experimental paradigm, six months after PFF  
99 injection (at an age of 12 months), we found that PFF injected WT mice exhibited reduced forelimb  
100 force generation in the grip strength test when compared to their saline-treated counterparts ( $P <$   
101 0.001, Fig. 1B), similar to what has been previously reported (29,30). In contrast, the PFF-induced  
102 weakening of grip strength was not observed in *Cdk14<sup>+/-</sup>* or in *Cdk14<sup>-/-</sup>* mice. We did not observe  
103 PFF-mediated changes (in any genotype tested) in the other 8 behavioral tests conducted (including  
104 tests for cognitive and motor function). Furthermore, we noted that saline-injected *Cdk14<sup>+/-</sup>* and  
105 *Cdk14<sup>-/-</sup>* mice consistently performed like their WT counterparts in each test, suggesting that  
106 chronic Cdk14 reduction is not deleterious to the brain (**fig. S2A**).

107

### 108 **Cdk14 loss lowers signal of cerebral pS129 $\alpha$ -Syn reactivity after intrastriatal PFF injection**

109 We next turned to histology to determine the relative pathological burden of accumulated  $\alpha$ -Syn  
110 throughout the brain of mice injected with PFFs. We stained for synucleinopathy-linked pS129  $\alpha$ -  
111 Syn in the brain of WT mice and found high amounts of pS129  $\alpha$ -Syn-positive cells in the PFF-  
112 injected hemisphere (ipsilateral to the injection, IL), which were absent in saline-injected controls  
113 ( $P < 0.01$ , data not shown). We then mapped the distribution of  $\alpha$ -Syn pathology at three different  
114 rostrocaudal levels near the injection site (relative to bregma: +0.98 mm, +0.26 mm and -1.34 mm)  
115 and found an overall blunting of pS129  $\alpha$ -Syn-positive pathology in the PFF-injected *Cdk14<sup>+/-</sup>* and  
116 *Cdk14<sup>-/-</sup>* mice when compared to their WT littermates (**Fig. 1C**). This was particularly evident IL  
117 at the level of the somatomotor cortex (bregma +0.26 mm) and in other areas of the cortex (**Fig.**

118 **1C**). Previous reports have shown that  $\alpha$ -Syn PFFs can induce nigrostriatal degeneration over time  
119 (28–30). We stained for tyrosine hydroxylase (TH) at the injection site in the striatum but did not  
120 observe a decrease of TH+ dopamine fibers in mice injected with PFFs (**fig. S2B**).

121

## 122 **Loss of Cdk14 mitigates PD-associated phenotypes in mice overexpressing human $\alpha$ -Syn**

123 We next asked whether partial loss of Cdk14 is sufficient to reduce  $\alpha$ -Syn-induced phenotypes in  
124 a more aggressive model of synucleinopathy. To do so, we crossed *Cdk14* heterozygous mice  
125 (*Cdk14*<sup>+/-</sup>) to wildtype (WT) or to  $\alpha$ -Syn-overexpressing transgenic (*mThy1-SNCA*, a.k.a. “ $\alpha$ -Syn  
126 *TG*”) mice (**Fig. 2A**) (31,32). These mice exhibit a 3-5-fold overexpression of human  $\alpha$ -Syn and  
127 exhibit a host of behavioral and neuropathological features reminiscent of PD within a few months  
128 of age (32). We only examined male mice as the  $\alpha$ -Syn *TG* transgene is located on the X  
129 chromosome leading to X-inactivation and mosaic phenotypes in female mice. We tested whether  
130 reduction of Cdk14 affects PD-like behavioral symptoms in 3-month-old  $\alpha$ -Syn *TG* mice (**Fig. 2**).  
131 We found that, in every test assayed,  $\alpha$ -Syn *TG* mice exhibited strong motor deficits when  
132 compared to their WT littermates (**Fig. 2B, C and D**). In the pole test, which is routinely used to  
133 measure PD-like motor impairment in mice (33,34), we observed that mice harboring both the  $\alpha$ -  
134 *Syn TG* allele and a loss of function *Cdk14* allele ( $\alpha$ -Syn *TG*; *Cdk14*<sup>+/-</sup>) did not display any motor  
135 dysfunction (**Fig. 2B**). This finding is particularly interesting given the high degree of  $\alpha$ -Syn  
136 overexpression compared to the modest reduction (50%) of Cdk14. In the beam break and nesting  
137 tests  $\alpha$ -Syn *TG*; *Cdk14*<sup>+/-</sup> mice displayed similar phenotype manifestations as their  $\alpha$ -Syn *TG*  
138 littermates (**Fig. 2C and D**).

139 We then measured the levels of  $\alpha$ -Syn and phosphorylated  $\alpha$ -Syn (pS129) isolated from  
140 hemibrains of 5-month-old mice (**Fig. 2E**). The reduction of Cdk14 induced a surprising increase

141 in pS129  $\alpha$ -Syn levels in the soluble fraction of  $\alpha$ -Syn *TG* mice, without affecting total  $\alpha$ -Syn  
142 dosage. However, in the insoluble protein fraction of this PD mouse line, Cdk14 loss did not alter  
143 pS129  $\alpha$ -Syn levels. Instead Cdk14 loss led to a mild, yet significant reduction of total  $\alpha$ -Syn.  
144 These data suggest that reducing Cdk14 alters  $\alpha$ -Syn metabolism, resulting in a net decrease of  
145 aggregated  $\alpha$ -Syn protein levels in the diseased mouse brain.

146

### 147 **Decreasing Cdk14 mitigates neurodegeneration in mice overexpressing human $\alpha$ -Syn**

148  $\alpha$ -Syn *TG* mice develop cortical and hippocampal cell loss as well as corresponding astrogliosis  
149 and pS129  $\alpha$ -Syn accumulation (31,35–37). We asked whether a 50% reduction of Cdk14 would  
150 be sufficient to alter brain pathologies in 5-month-old  $\alpha$ -Syn *TG* mice. We found that  $\alpha$ -Syn  
151 overexpression induced robust neuronal loss in the hippocampus (CA3 region) and cortex (Layer  
152 V). In contrast, double mutant ( $\alpha$ -Syn *TG*; *Cdk14*<sup>+/-</sup>) littermates did not develop this level of  
153 neurodegeneration in these brain regions (**Fig. 3A and B**). We measured the presence of aggregate-  
154 associated  $\alpha$ -Syn species via pS129  $\alpha$ -Syn staining and the degree of astrogliosis via GFAP  
155 staining. We found that  $\alpha$ -Syn *TG* mice developed pS129-positive  $\alpha$ -Syn pathology and  
156 astrogliosis, regardless of the *Cdk14* genotype (**fig. S3A and B**).

157

### 158 **Knockdown of CDK14 decreases $\alpha$ -Syn and pS129 $\alpha$ -Syn levels in human neurons**

159 Having observed the benefits of Cdk14 depletion in two mouse models of PD with different  
160 degrees of  $\alpha$ -Syn pathology, we next tested whether this benefit translates to human neurons. We  
161 infected DaNs derived from a PD patient carrying an A53T mutation in  $\alpha$ -Syn (38) as well as its  
162 isogenic control with lentiviruses carrying Cas9/sgRNAs against *CDK14*. Neurons infected with  
163 sgRNAs targeting either exon 3 (E3) or exon 8 (E8) of *CDK14*, exhibited approximately 50% of

164 the CDK14 levels of the control cultures (**Fig. 3C**). We found that A53T mutant cells showed a  
165 marked increase of pS129  $\alpha$ -Syn compared to isogenic controls and, in parallel, PD neurons with  
166 silenced *CDK14* exhibited significantly lower pS129 levels (**Fig. 3C**).

167

### 168 **Pharmacological targeting of CDK14 decreases $\alpha$ -Syn levels and mitigates its pathogenic** 169 **accumulation**

170 As kinases are typically druggable targets which can be inhibited in non-invasive ways (39), we  
171 next asked whether CDK14 pharmacological inhibition would be a tractable route for decreasing  
172  $\alpha$ -Syn levels. We used a recently developed CDK14 covalent inhibitor (FMF-04-159-2) (26) to  
173 test whether acute depletion of CDK14 decreased  $\alpha$ -Syn levels. We found that in HEK293T cells,  
174 CDK14 inhibition induced a strong reduction in endogenous  $\alpha$ -Syn protein levels (**Fig 4A**). We  
175 asked whether CDK14 inhibition-induced  $\alpha$ -Syn clearance was mediated by the ubiquitin  
176 proteasome system (UPS) or autophagy. We found that blocking the UPS or autophagy did not  
177 affect the reduction of  $\alpha$ -Syn dosage, induced by CDK14 inhibition (**fig. S3C**). Rather, blocking  
178 CDK14 resulted in decreased *SNCA* transcript levels. Moreover, we observed that CDK14 itself  
179 was being cleared via the UPS. We next asked if CDK14 inhibition decreases  $\alpha$ -Syn levels in  
180 hESC-derived cortical neurons. CDK14 inhibition caused a dose-dependent reduction in total  $\alpha$ -  
181 Syn concentration by ELISA (**Fig. 4B**). Lastly, we tested whether application of this inhibitor was  
182 sufficient to block  $\alpha$ -Syn pathology in rat primary neuronal cultures treated with  $\alpha$ -Syn PFFs. We  
183 found that Cdk14 inhibition markedly reduced the PFF-induced elevation of high molecular weight  
184  $\alpha$ -Syn species over a five-day period (**Fig. 4C**). Thus, pharmacological treatment of isolated human  
185 neurons or PFF-challenged rat neurons with a CDK14 inhibitor showed consistent reduction in  $\alpha$ -  
186 Syn protein.

187



188 **DISCUSSION**

189  $\alpha$ -Syn is increasingly considered a valid experimental therapeutic target for PD, based on clinical  
190 genetic and neuropathological evidence, as well as animal and cell culture studies. *SNCA* gene  
191 mutations or amplifications resulting in  $\alpha$ -Syn pathology are tightly linked to PD pathogenesis.  
192 Moreover,  $\alpha$ -Syn is a major constituent of Lewy-like structures, the pathological hallmark of PD  
193 and related synucleinopathies. Thus, targeting  $\alpha$ -Syn has been a major thrust in the pharmaceutical  
194 realm. One aspect of  $\alpha$ -Syn pathology that has been difficult to overcome is the notion that different  
195 states of its post-translational modification or aggregation differentially affect disease  
196 pathogenesis: a clear image has yet to emerge as to the real culprit of  $\alpha$ -Syn toxicity. Although  
197 novel strategies such as anti-sense oligonucleotides, immunotherapy and small molecule inhibitors  
198 of  $\alpha$ -Syn aggregation are being explored (40), finding a target that can be pharmacologically  
199 inhibited still holds potential as a minimally invasive and simple strategy to lower  $\alpha$ -Syn levels –  
200 especially when such treatment course would be made over several decades. Indeed, a growing  
201 body of evidence suggests that  $\alpha$ -Syn may play a role not only at the presynaptic space, but also  
202 in the immune system (41–43). Therefore, careful titration of its levels may be more clinically  
203 pertinent. As a result, we asked whether candidates that are more amenable to traditional  
204 pharmacology (e.g. kinases) could regulate  $\alpha$ -Syn dosage, irrespective of its aggregation status.  
205 Our previous studies identified a handful of these modifiers including TRIM28 and DCLK1  
206 (8,22,36,44). Here, we study a heretofore unexplored target for disease modification in pre-clinical  
207 models of PD: CDK14.

208 Building on our initial identification of CDK14 as a potential regulator of  $\alpha$ -Syn levels (22),  
209 we show that reduction of CDK14 is well tolerated and causes a reduction in pathogenic  $\alpha$ -Syn  
210 accumulation in murine and human models of synucleinopathy. Genetic suppression of *Cdk14*  
211 ameliorates the accumulation of pathologically linked pS129  $\alpha$ -Syn in the cortex of PFF-injected

212 mice and halts the development of PD-related motor defects. Moreover, we show that halving  
213 Cdk14 in the brains of  $\alpha$ -Syn overexpressing mice is sufficient to blunt the development of PD-  
214 associated neurodegenerative phenotypes. Importantly, the genetic reduction of CDK14 in DaNs  
215 derived from an individual with synucleinopathy shows equal promise in preventing phenotypic  
216 development. Lastly, we show that a newly developed CDK14 inhibitor, FMF-04-159-2,  
217 effectively inhibits CDK14, decreases  $\alpha$ -Syn levels in hESC-derived human neurons, and mitigates  
218 PFF-induced  $\alpha$ -Syn pathology in rat cortical neurons. Collectively, these results show that CDK14  
219 is a pharmacologically tractable target for synucleinopathy.

220 We found that while the net effect of decreasing CDK14 on reducing  $\alpha$ -Syn levels and its  
221 associated phenotypes were consistent, its effect on  $\alpha$ -Syn phosphorylation was context-  
222 dependent. For instance, genetic reduction of CDK14 resulted in decreased pS129  $\alpha$ -Syn in both  
223 the PFF model as well as the human DaNs derived from the *SNCA-A53T* carrier. In contrast, partial  
224 reduction of Cdk14 resulted in an increase in soluble pS129  $\alpha$ -Syn in the  *$\alpha$ -Syn TG* line, despite  
225 decreasing total aggregated  $\alpha$ -Syn and blunting neurodegenerative phenotypes. We surmise that  
226 Cdk14 mediates its effect toward  $\alpha$ -Syn not directly via its phosphorylation. Indeed, we could not  
227 detect any kinase activity of recombinant CDK14 toward wild-type  $\alpha$ -Syn *in vitro* (data not  
228 shown). Thus, we hypothesize that loss or inhibition of CDK14 causes a decrease in  $\alpha$ -Syn through  
229 an unknown mediator, affecting maintenance of *SNCA* transcript and  $\alpha$ -Syn protein levels. Future  
230 studies will help refine the mechanism whereby CDK14 regulates  $\alpha$ -Syn.

231 Our results examining the genetic and pharmacological reduction of CDK14 in PD models  
232 pioneer future pre-clinical studies. In all behavioral experiments conducted, Cdk14<sup>-/-</sup> mice were  
233 indistinguishable from WT mice (**Fig 1B** and **fig S1**), implying that *Cdk14* loss is not deleterious  
234 *in vivo*. This is supported by human genetics where loss of *CDK14* appears to be well tolerated

235 (probability of loss of function intolerance [pLI] = 0; gnomAD database, CDK14 | gnomAD  
236 v2.1.1), (45)). Moreover, the activity of the CDK14 inhibitor in human neurons appears to be high,  
237 affecting CDK14 (and thus  $\alpha$ -Syn metabolism) in the nanomolar range. While FMF-04-159-2 has  
238 yet to be tested in animal models, our cell culture experiments provide proof-of-principle for its  
239 potential role in the reduction of  $\alpha$ -Syn pathology. Further preclinical experiments will address the  
240 safety of FMF-04-159-2 in animals and test whether the drug rescues PD-like models of  
241 synucleinopathies; potentially paving the way for its application in human subjects.

242 In sum, we show that CDK14 inhibition causes a decrease total  $\alpha$ -Syn concentrations under  
243 both *ex vivo* and *in vivo* conditions and consequently ameliorates  $\alpha$ -Syn-driven phenotypes in  
244 mouse and human PD models. Given the strong evidence linking  $\alpha$ -Syn levels to PD pathogenesis,  
245 we conclude that targeting CDK14 function holds promise as a potentially disease-modifying  
246 approach to treat PD.

247

## 248 MATERIALS AND METHODS

### 249 Study design

250 The objective of this study was to analyze whether reduction of CDK14 decreases  $\alpha$ -Syn pathology  
251 *in vitro* and *in vivo*. To test if Cdk14 reduction mitigates  $\alpha$ -Syn-induced toxicity in PD mouse  
252 models, we injected preformed mouse  $\alpha$ -Syn fibrils (PFFs) in the brains of *Cdk14<sup>+/-</sup>*, *Cdk14<sup>-/-</sup>* and  
253 WT littermate mice. In addition, we combined mice with genetic reduction of *Cdk14* with mice  
254 overexpressing full-length human  $\alpha$ -Syn to test whether genetic reduction of *Cdk14* ameliorates  
255 PD-like characteristics. Dosage of  $\alpha$ -Syn protein was analyzed in human neurons from *SNCA A53T*  
256 carriers with reduced CDK14 levels. Furthermore, we asked if pharmacological inhibition of  
257 CDK14 affects  $\alpha$ -Syn levels in rodent and human cells and applied the CDK14 inhibitor FMF-04-

258 159-2 to cultured rat and hESC-derived human cortical neurons. Sample size was established prior  
259 to study onset and were generally picked based on previous data from the literature using these  
260 models. All procedures with mice were performed in accordance with the guidelines of the  
261 Canadian Council on Animal Care and stipulations of the Ethics Board and the Animal Care  
262 Committee at the University of Ottawa.

263

### 264 **Mouse strains**

265 *Cdk14*<sup>+/-</sup> mice were generated by the Gene Targeting and Transgenic Facility of Texas A&M  
266 Institute for Genomic Medicine (TIGM), on a mixed (129/SvEvBrd x C57BL/6) background (as  
267 described previously (27)). *Cdk14*<sup>+/-</sup> mice were backcrossed 14 times to the C57Bl/6NCrl  
268 background prior to experimentation (PFF or genetic interaction). *Cdk14*<sup>+/-</sup> mice were paired to  
269 generate *Cdk14*<sup>-/-</sup> mice. Since the *α-Syn TG* transgene is located on the X chromosome (32), *α-Syn*  
270 *TG*; *Cdk14*<sup>+/-</sup> X chromosomal females were paired with *Cdk14*<sup>+/-</sup> males. Resulting WT, *α-Syn TG*,  
271 *Cdk14*<sup>+/-</sup> and *α-Syn TG*; *Cdk14*<sup>+/-</sup> males were used for experimental procedures. Only males were  
272 used for experiments as female mice undergo X chromosome inactivation, resulting in variable  
273 phenotypes. Behavioral experiments were performed on 3-month-old mice.

274

### 275 **Stereotactic PFF injections**

276 Endotoxin-free recombinant mouse *α-Syn* fibril preparations were stored at -80°C before usage  
277 (46,47). On the day of the stereotactic injections, fibrils were thawed and sonicated in a sonicator  
278 water bath to generate PFFs (Covaris S220, 18 W peak incident power, 20% duty factor, 50 cycles  
279 per burst, 150 seconds). For transmission electron microscopy (TEM) analysis (Transmission  
280 Electron Microscopy Core Facility, University of Ottawa) 0.2 mg/mL PFF samples were stained

281 with Uranyl Acetate and imaged on a FEI Tecnai G2 Spirit Twin TEM. 6-month-old mice were  
282 deeply anesthetized with isoflurane, and 1  $\mu$ L PFFs (5 mg/mL) or sterile saline (0.9% NaCl) was  
283 unilaterally delivered into the dorsal striatum of the right hemisphere at these coordinates relative  
284 to bregma: -2 mm medial-lateral; +0.2 mm antero-posterior and -2.6 mm dorso-ventral. Injections  
285 were performed using a 2  $\mu$ L syringe (Hamilton, Reno, NV, USA) at a rate of 0.1  $\mu$ L/min with the  
286 needle left in place for at least 3 minutes before its slow withdrawal. After surgery, animals were  
287 monitored, and post-surgical care was provided. Behavioral experiments were performed 6 months  
288 post injection, followed by the collection of the brains at 7 months post injection.

289

## 290 **Behavioral experiments**

291 Grip strength tests were performed by holding the mice at an automatic grip strength meter  
292 (Chatillon DFE II, Columbus Instruments) allowing them to grip the grid of the device with their  
293 fore- and hindlimbs. Then, mice were gently pulled back by their tail until they released the grip.  
294 Force exerted by the mouse during its removal from the grid, as measured by gram force (g), was  
295 evaluated 5 times per mouse. For nesting behavior tests, mice were singly caged overnight (16  
296 hours) with a 5x5cm cotton nestlet in a clean cage. Produced nests were scored on a scale from 1-  
297 5 as previously described (48). For beam break tests single mice were placed in the testing  
298 apparatus (Omnitech Electronics) for 24 hours with standard rodent chow and water *ad libitum*.  
299 Locomotion is presented as distance travelled. Pole tests were performed by placing the mice on  
300 the top of a vertical pole (8 mm diameter and 55 cm height) with a rough surface. Mice were placed  
301 with their head facing the room ceiling and the time required for turning was recorded. The mean  
302 time to turn was calculated from 5 consecutive trials for each mouse.

303

## 304 **Tissue harvesting and processing**

305 For biochemical approaches with hemibrains from 5-month-old *α-Syn TG Cdk14<sup>+/-</sup>* mice and their  
306 littermates, mice were anesthetized with isoflurane (Fresenius Kabi, CP0406V2), and decapitated.  
307 Brains were isolated and hemibrains were lysed 1:4 (w/v) in NETN buffer (250 mM NaCl, 5 mM  
308 EDTA pH 8, 0.5% NP-40, 50 mM Tris-HCL, pH 8 in ddH<sub>2</sub>O) with protease (GenDEPOT, P3100)  
309 and phosphatase inhibitors (GenDEPOT, P3200) using Dounce homogenizers. Lysates were  
310 cleared by centrifugation at 18,000 x g for 20 minutes at 4°C. Cleared lysates were transferred to  
311 a new, low protein binding tube, and the pellets were frozen at -80°C for subsequent analysis. To  
312 isolate insoluble proteins, pellets were thawed and resuspended in 88% formic acid 1:1 (w/v).  
313 Samples were left to incubate for 1 hr at room temperature, then diluted to 22 % formic acid content  
314 with PBS. Samples were dried overnight at 60 °C in an Eppendorf Vacufuge concentrator. Dried  
315 protein was resuspended in phosphate-buffered saline (PBS) with protease and phosphatase  
316 inhibitors at 1:4 (w/v) based on the initial hemibrain weight. Samples were sonicated at 20 % 10  
317 sec ON, 10 sec OFF for 4 minutes total time, using an FB120 sonicator (Fisher Scientific) with CI-  
318 18 probe (Qsonica), while kept on ice.

319 For immunohistology with paraffin sections, mice were anesthetized with 120 mg/kg Euthanyl  
320 (DIN00141704) and intracardially perfused with 10 mL of PBS, followed by 20 mL of 10 %  
321 Buffered Formalin Phosphate (Fisher Scientific, SF100-4). Brains were isolated and fixed in 10 %  
322 Buffered Formalin Phosphate at 4°C for at least 24 hours. After dehydration by 70 %, 80 %, 90 %  
323 and 100 % ethanol and clearing by Xylenes, brains were infiltrated and embedded in paraffin  
324 (Louise Pelletier Histology Core Facility, University of Ottawa). Brains were sectioned at 5 μm.

325

## 326 **SDS-PAGE and mouse protein immunoblots**

327 4X Laemmli buffer (Bio-Rad, 1610747) with 20 % 2-mercaptoethanol (Bio-Rad, 1610710) was  
328 added to cleared protein and boiled at 95 °C for 5 minutes. Protein samples were loaded on a 12  
329 % SDS-PAGE gel in the Mini-PROTEAN Tetra Cell (Bio-Rad, 165-8000). Protein was then  
330 transferred to a 0.2 µm nitrocellulose membrane (Bio-Rad, 1620112) using the Mini Trans-Blot  
331 Electrophoretic Transfer Cell (Bio-Rad, 1703930) in Tris-Glycine buffer with 10 % methanol  
332 (Fisher Scientific, A412P) at 340mA for 90 minutes at 4 °C. Membranes were then blocked in 5  
333 % milk in 1X TBS-T for 1hr at room temperature followed by overnight incubation in primary  
334 antibody against pSer129 α-Syn (1:2,000, Abcam, 51253), α-Syn (1:2,000, BD Biosciences,  
335 610787), CDK14 (1:500, Santa Cruz, sc50475) and GAPDH (1:40,000, Proteintech, 60004-1-Ig)  
336 diluted in 2% BSA, 0.02% NaN<sub>3</sub> in 1X TBS-T. Next, membranes were washed in TBS-T, followed  
337 by incubation in secondary antibody (peroxidase-conjugated donkey anti-rabbit IgG, Cedarlane,  
338 711-035-152 or donkey anti-mouse IgG, Cedarlane, 715-035-150, both at 1:10,000 diluted in 5%  
339 milk in TBS-T) for 1 hour at room temperature. Membranes were washed again in TBS-T, bathed  
340 in enhanced chemiluminescent reagent (Bio-Rad, 1705061), imaged using the ImageQuant LAS  
341 4100 Imaging system (GE) and quantified using Image Lab 6.1 software (Bio-Rad Laboratories).

342

### 343 **Immunohistology**

344 For Diaminobenzidine (DAB) antibody staining, paraffin sections were deparaffinized in xylenes  
345 and rehydrated in a series of decreasing ethanol (100 %, 90 %, 70 %, 50 %) followed by antigen  
346 retrieval in sodium citrate buffer (2.94 g sodium citrate, 0.5 mL Tween-20 in 1 L PBS, pH6) at  
347 95°C for 20 min and quenching of endogenous peroxidase with 0.9 % H<sub>2</sub>O<sub>2</sub> in PBS for 10 min.  
348 Sections were blocked in blocking buffer (0.1 % Triton X-100, 10 % normal horse serum in PBS)  
349 and incubated in primary antibody (pSer129 α-Syn, 1:500, Abcam, 51253 or tyrosine hydroxylase,

350 1:1,000, Sigma-Aldrich, AB152) overnight at 4 °C. Then, sections were incubated in secondary  
351 antibody (donkey anti-rabbit biotin-conjugated, Jackson ImmunoResearch, 711-065-152, 1:250 in  
352 blocking buffer) for 2 hours and tertiary antibody solution (streptavidin-horseradish peroxidase  
353 conjugated, 1:500 in blocking buffer, Sigma-Aldrich, RPN1231V) for 2 h before being exposed to  
354 DAB (Vector, SK-4100) for 10 minutes. Hematoxylin counterstaining was conducted using the  
355 H&E Staining Kit (Abcam, ab245880) as per manufacturer's instructions. Stained sections were  
356 dehydrated in a series of ethanol and xylenes solutions, followed by mounting sections with  
357 Permount (Fisher Scientific, SP15-100).

358 For immunofluorescence antibody staining, after the deparaffinization/dehydration, antigen  
359 retrieval and blocking, sections were incubated in primary antibody (NeuN, 1:500, EMD  
360 Millipore, MAB377 or GFAP, 1:1,000, Synaptic Systems, 173 004) in blocking buffer overnight  
361 at 4°C. Next, sections were incubated in secondary antibody (donkey anti-mouse IgG (H+L) Alexa  
362 Fluor™ 568, Thermo Fisher Scientific, A10037, for NeuN and goat anti-guinea pig IgG (H+L)  
363 Alexa Fluor™ 488, for GFAP) together with DAPI (Sigma-Aldrich, D9542) for 1 hour at RT,  
364 followed by mounting sections with fluorescence mounting medium (Agilent, S302380-2).  
365 Brightfield and epifluorescence micrographs were acquired using an Axio Scan Z1 Slide Scanner  
366 (20x objective, Louise Pelletier Histology Core Facility) and a Zeiss AxioImager M2 (10x  
367 objective, Cell Biology and Image Acquisition Core Facility, University of Ottawa) and analyzed  
368 using ImageJ (National Institute of Health, 1.52p) with 2-3 sections per mouse by a blinded  
369 investigator. Heatmaps were generated by counting pS129  $\alpha$ -Syn positive cells in defined regions  
370 of the brain (<http://atlas.brain-map.org>), normalized to the area occupied by the region and  
371 resulting cell densities were expressed as hues of red.

372



373 **Cell culture**

374 Cells were kept at 37 °C, 5 % O<sub>2</sub>, 10 % CO<sub>2</sub>. HEK293T cells (ATCC, CRL-3216) were cultured  
375 in Dulbecco's modified Eagle's medium (DMEM, Wisent Bioproducts, 319-015-CL),  
376 supplemented with 10% FBS (Sigma-Aldrich, F1051) and antibiotic/antimitotic (Thermo  
377 Scientific, 15240062).

378

379 **hiPSC culture, neuronal differentiation, and Cas9-mediated gene editing**

380 hiPSC isogenic lines (Female) and hESC isogenic lines (Male) were generated as described by  
381 (38). Genotypes of hESC-derived WT, A53T, and E46K as well as hiPSC-derived Corrected and  
382 A53T cell lines were confirmed by restriction digest of genomic DNA (38). hiPSCs were cultured  
383 as previously described (49) with slight modifications. Briefly, pluripotent cells were plated in  
384 mTeSR (Stem Cell Technologies) and media was changed daily. The colonies were manually  
385 passaged weekly. Differentiation of hPSCs into A9-type DaNs was performed by following a floor  
386 plate differentiation paradigm (49,50). Immediately preceding differentiation, the colonies were  
387 dissociated into a single cell suspension using HyQTase. hPSCs were collected and re-plated at  
388  $4 \times 10^4$  cells/cm<sup>2</sup> on Matrigel (BD)-coated tissue culture dishes for differentiation. Floor-plate  
389 induction was carried out using hESC-medium containing knockout serum replacement (KSR),  
390 LDN193189 (100 nM), SB431542 (10 μM), Sonic Hedgehog (SHH) C25II (100 ng/mL,  
391 Purmorphamine (2 μM), Fibroblast growth factor 8 (FGF8; 100 ng/mL), and CHIR99021 (3 μM).  
392 On day 5 of differentiation, KSR medium was incrementally shifted to N2 medium (25%, 50%,  
393 75%) every 2 days. On day 11, the medium was changed to Neurobasal/B27/Glutamax  
394 supplemented with CHIR. On day 13, CHIR was replaced with Brain Derived Neurotrophic Factor  
395 (BDNF; 20 ng/mL), ascorbic acid (0.2 mM), Glial Derived Neurotrophic Factor (GDNF; 20

396 ng/mL), transforming growth factor beta 3 (TGFβ3; 1 ng/mL), dibutyryl cAMP (dbcAMP; 0.5  
397 mM), and DAPT (10 μM) for 9 days. On day 20, cells were dissociated using HyQTase and re-  
398 plated under high cell density 4x10<sup>5</sup> cells/cm<sup>2</sup> in terminal differentiation medium (NB/B27 +  
399 BDNF, ascorbic acid, GDNF, dbcAMP, TGFβ3 and DAPT) also referred to as DA Neuron (DAN)-  
400 Medium, on dishes pre-coated with poly-ornithine (15 μg/mL)/laminin (1 μg/mL)/fibronectin (2  
401 μg/mL). Cells were differentiated for up to 60 DIV, with analysis being performed at DIV14, DIV  
402 45 and/or DIV 60. At D10D and D14D or differentiation, hPSC cultures were transduced with  
403 lentivirus containing Cas9 (lentiCRISPR v2, addgene, plasmid #52961) with the following  
404 gRNAs: non-targeting (5'-CGCTTCCGCGCCCGTTCAA-3'), CDK14 exon 3 (5'-  
405 GCAAAGAGTCACCTAAAGTT-3') and exon 8 (5'-TGTGCAAATATAACGCTGG-3').  
406 From D10D-D14D media was supplemented with 0.1 μM compound E (AlfaAesar, J65131). At  
407 D18D, cells were replated onto poly-ornithine (15 μg/mL)/laminin (1 μg/mL)/fibronectin (2  
408 μg/mL) coated plates. Cells were maintained in DAN-medium (DMEM/F12, 200uM Ascorbic  
409 Acid, 0.5 mM dbcAMP, 20 ng/mL BDNF, 20 ng/mL GDNF, 1 ng/mL TGFb3, and 1 % Anti-Anti)  
410 for 6-7 weeks where lysates were then collected for protein analysis.

411

#### 412 **hESC culture, neuronal differentiation and *in vitro* CDK14 inhibitor treatment**

413 Dishes for hESC cultures were coated with 0.15 mg/mL growth factor reduced Matrigel (Corning,  
414 354230) in DMEM/F-12 (Thermo Fisher Scientific, 11320033) for 1 hour at room temperature  
415 prior to cell seeding. H9 hESCs (WiCell, WA09) were seeded as colonies and maintained in  
416 mTeSR Plus (StemCell Technologies, 05825). Neural progenitor cell (NPC) differentiation was  
417 initiated when the hESC cultures reached 90% confluence, by replacing growth medium with  
418 Knockout Serum Replacement (KSR) medium (414 mL Knockout-DMEM (Thermo Fisher

419 Scientific, 10829018), 75 mL Knockout-serum replacement (Thermo Fisher Scientific,  
420 10828028), 5 mL Glutamax (Thermo Fisher Scientific, 35050061), 5 mL MEM-NEAA (Thermo  
421 Fisher Scientific, 11140050), 500  $\mu$ L 2-mercaptoethanol (Thermo Fisher Scientific, 21985023),  
422 500  $\mu$ L Gentamicin (Wisent Bioproducts 450-135), 10  $\mu$ M SB431542 (Tocris, 1614) and 500 nM  
423 LDN-193189 (Stemgent, 04-0074). Differentiation medium was replaced daily on days 4 and 5 by  
424 75:25 KSR:N2 medium (486.5 mL DMEM/F-12 (Thermo Fisher Scientific, 11320033), 5 mL 15%  
425 glucose, 5 mL N2 supplement (Thermo Fisher Scientific, 17502048), 500  $\mu$ L 20 mg/mL human  
426 insulin (Wisent Bioproducts, 511-016-CM), 2.5 mL 1M HEPES (Thermo Fisher Scientific,  
427 15630080), 500  $\mu$ L Gentamicin), on days 6 and 7 by 50:50 KSR:N2, on days 8 and 9 by 25:75  
428 KSR:N2 and on days 10 and 11 by N2 medium containing 500 nM LDN-193189. On day 12,  
429 differentiated NPCs were treated with Y-27632 (Tocris, 1254) for 4 hours, dissociated with  
430 Accutase (Stemcell Technologies, 07922) and seeded into Matrigel coated dishes containing  
431 Neural Induction Medium (NIM, 244 mL DMEM/F12, 244 mL Neurobasal medium (Thermo  
432 Fisher Scientific, 21103049), 2.5 mL N2 Supplement, 5 mL B-27 Supplement (Thermo Fisher  
433 Scientific, 17504044), 2.5 mL GlutaMAX<sup>TM</sup> (Thermo Fisher Scientific, 35050061), 125  $\mu$ L 20  
434 mg/mL human insulin, 500  $\mu$ L 20  $\mu$ g/mL FGF2 (StemBeads, SB500), 10  $\mu$ L 1 mg/mL hEGF  
435 (Millipore Sigma E9644) and 500  $\mu$ L Gentamicin) for expansion. NPCs were passaged at full  
436 confluence a minimum of one time before neuronal differentiation.

437 For NPC-neuronal differentiation culture dishes were coated with 0.001 % Poly-L-  
438 ornithine (Millipore Sigma, P4957) at 4 °C overnight, followed by 25  $\mu$ g/mL laminin (Millipore  
439 Sigma, L2020) for 2 h at room temperature. NPCs were treated with Y-27632 for 4 hours,  
440 dissociated with Accutase and seeded at a density of 20,000 cells/cm<sup>2</sup> in NIM. Neuronal  
441 differentiation was initiated when NPCs reached 70% confluence by replacing growth medium

442 with neuronal differentiation medium (244 mL DMEM/F-12 medium, 244 mL Neurobasal  
443 medium, 2.5 mL N2 supplement, 5 mL B27 supplement, 200  $\mu$ L 50  $\mu$ g/ml BDNF (Peprotech, 450-  
444 02), 200  $\mu$ L 50  $\mu$ g/ml GDNF (Peprotech, 450-10), 250 mg dibutyryl cyclic-AMP (Millipore  
445 Sigma, D0627), 500  $\mu$ L 100 M L-ascorbic acid (FujiFim Wako Chemicals, 323-44822), and 500  
446  $\mu$ L Gentamicin). Cells were fed every 3 days for 18 days to obtain immature neuronal networks.  
447 FMF-04-159-2 (R&D Systems, 7158) was dissolved in DMSO (Fisher Scientific, BP231) and  
448 applied in cell culture medium to hESC-derived neurons for 72 hours and to HEK293T cells for  
449 18 hours. HEK293T cells were treated with 500 nM of FMF-04-159-2 together with 200 nM of  
450 Bafilomycin A1 (in DMSO, NEB, 54645S) or 1  $\mu$ M of MG-132 (in DMSO, EMD Millipore,  
451 474790) for 18 hours to inhibit autophagy or the UPS, respectively. For protein analysis cells were  
452 washed with cold PBS, scraped, and collected in low protein binding microcentrifuge tubes  
453 (Thermo Scientific, 90410). Cells were pelleted by centrifugation at 1,000 x g for 5 minutes at  
454 4°C. The supernatant was aspirated, and the cells were lysed in cold RIPA buffer (50 mM Tris, pH  
455 7.5, 150 mM NaCl, 0.1% SDS, 0.5% sodium deoxycholate; 1% NP-40, 5 mM EDTA, pH 8.0) with  
456 protease and phosphatase inhibitors. Cell lysates were incubated on ice for 20 minutes, with  
457 vortexing every 5 minutes. Lysates were centrifuged at 18,000 x g for 20 minutes at 4 °C to pellet  
458 cell debris. Autophagic activity was monitored by immunoblots for LC3B (Novus Biologicals,  
459 NB100-2220). Proteasome activity was monitored by immunoblots for poly-ubiquitinated proteins  
460 (anti-ubiquitin P4D1, Cell Signaling Technology, 3136).

461

#### 462 **RNA extraction and Reverse Transcription Quantitative PCR (RTqPCR)**

463 RNA from HEK293T cells was extracted using the RNeasy Mini Kit (Qiagen, 74106) following  
464 the manufacturer's guidelines. cDNA was synthesized using the 5X All-in-One RT Master Mix

465 Kit (BioBasic, HRT025-10). RTqPCR was conducted using the Green-2-Go qPCR Master Mix  
466 (BioBasic, QPCR004-S) with 25 ng DNA per reaction and primers targeting *GAPDH* (Forward:  
467 5'-CGACCACTTTGTCAAGCTCA-3', Reverse: 5'-TTACTCCTTGGAGGCCATGT-3'),  
468 *HPRT1* (Forward: 5'-GACCAGTCAACAGGGGACAT-3', Reverse: 5'-  
469 GTGTCAATTATATCTTCCACAATCAAG-3') and *SNCA* (Forward: 5'-  
470 ACCAAACAGGGTGTGGCAGAAG-3', Reverse: 5'-CTTGCTCTTTGGTCTTCTCAGCC-3').  
471 Reactions were performed in a BioRad CFX96 thermocycler (protocol: 95 °C for 5 minutes, 40  
472 cycles of 95 °C for 15 seconds and 60 °C for 60 seconds, followed by melting curve). *SNCA* Ct  
473 values were standardized to the average of *GAPDH* and *HPRT1* Ct values and *SNCA* expression  
474 was displayed as fold change of the DMSO control.

475

#### 476 **ELISA**

477 ELISA  $\alpha$ -Syn protein quantification was performed as previously described (41,51). 384-well  
478 MaxiSorp plates (Nunc, Inc) were coated with capturing antibody ( $\alpha$ -Syn, BD Biosciences,  
479 610787) diluted 1:500 in coating buffer (NaHCO<sub>3</sub> with 0.2 % NaN<sub>3</sub>, pH 9.6) overnight at 4 °C.  
480 Following 3 washes with PBS/0.05 % Tween-20 (PBST), plates were blocked for 1 hour at 37 °C  
481 in blocking buffer (1.125 % fish skin gelatin; PBS-T). After 3 washes, samples were loaded in  
482 duplicates and incubated at RT for 2 hours. Biotinylated hSA4 antibody (in-house antibody) was  
483 generated using 200  $\mu$ g Sulfo-NHS-LC Biotin (Pierce), diluted 1:200 in blocking buffer and added  
484 to the plate for 1 hour at 37 °C. Following 5 washes, ExtrAvidin phosphatase (Sigma E2636)  
485 diluted in blocking buffer was applied for 30 min at 37 °C. Color development was carried out by  
486 using fast-p-nitrophenyl phosphate (Sigma, N1891) and monitored at 405 nm every 2.5 min for up

487 to 60 min. Saturation kinetics were examined for identification of time point(s) where standards  
488 and sample dilutions were in the log phase.

489

#### 490 **Primary rat neurons, human $\alpha$ -Syn PFFs and protein analysis**

491 Cortical neurons were harvested from the E18 Sprague Dawley rat embryos (Charles River). The  
492 harvested cortical tissue was digested using 17 U/mg Papain followed by mechanical dissociated  
493 by gentle trituration through a glass flamed Pasteur pipet. The cells were seeded into plates coated  
494 24 hours prior to dissection with Poly-D-Lysine (0.15 mg/mL). The cells were incubated at 37 °C,  
495 7.5 % CO<sub>2</sub> until collection. Every 3 to 4 days, a 50% media change was performed (2 % B27  
496 supplement, 1 % antibiotic/antimycotic, 0.7 % BSA Fraction V, 0.1 %  $\beta$ -mercaptoethanol in  
497 HEPES-buffered DMEM/F12). Where required, cells were exposed to 100 nM FMF-04-159-2  
498 (Bio-Techne, 7158/10) dissolved in DMSO, at 14 DIV, and again at the subsequent feed (18 DIV).  
499 At 14 DIV, cells were exposed to either 1  $\mu$ g/mL human  $\alpha$ -Syn PFFs, or 1  $\mu$ g/mL monomeric  $\alpha$ -  
500 Syn. Cell lysates were collected at D0 (no exposure), D1, D3, and D5 post PFF or monomeric  
501 exposure. Human  $\alpha$ -Syn protein was isolated from BL21-CodonPlus (DE3)-RIPL competent cells  
502 transformed with pET21a-alpha-synuclein and purified by Reversed-phase HPLC. PFFs were then  
503 generated as previously described (52). Purified  $\alpha$ -Syn (5  $\mu$ g/mL in PBS) was incubated at 37°C  
504 with constant shaking for 7 days, then aliquot and stored at -80 °C. Prior to use, PFFs were thawed  
505 and diluted in PBS, then subjected to sonication (20 % amplitude, 30 seconds; 1 second on, 1  
506 second off) and added to neuronal media for exposure to neurons at a concentration of 1  $\mu$ g/mL  
507 for 24 hours. Following the incubation, cell lysates were collected in 150  $\mu$ L ice-cold RIPA buffer  
508 containing phosphatase and protease inhibitors (1 mM aprotinin, 1 mM sodium orthovanadate, 1  
509 nM sodium fluoride, and 10 mM phenylmethylsulfonyl fluoride). Samples were homogenized

510 using a 18G needle, left on ice to rest for 15 minutes, and then centrifuged at 14,000 g to remove  
511 any cellular debris. Using the BioRad DC Protein Assay kit, the protein concentration of each  
512 sample was quantified following the manufacturers guidelines. SDS-PAGE was performed using  
513 a 12.5 % resolving gels and a 4 % stacking gels, and gels were run for 15 minutes at 80 V followed  
514 by approximately 1.5 hours at 110 V. The gels were transferred onto 0.2  $\mu$ M nitrocellulose  
515 membranes at 35 V and 4°C overnight. Following the transfer, the membranes were blocked for 1  
516 hour at room temperature using blocking buffer (5 % non-fat dry milk in 1X PBS) with constant  
517 agitation. Primary antibodies were prepared in blocking buffer containing 0.1 % Tween20 and  
518 were probed overnight at 4 °C under constant agitation (CDK14, 1:1,000, Santa Cruz, sc50475,  
519 TH, 1:1,000, Pel Freeze, P40101, a-Syn, 1:1,000, BD, BD 610787, pS129 a-Syn, 1:500, abcam,  
520 ab51253,  $\beta$ -Actin, 1:1,000, rabbit, Biologend, 622101 or mouse, Sigma, A5411,  $\beta$ III-Tubulin,  
521 1:5,000, rabbit, Biologend, 802001). Following primary antibody incubation, membranes were  
522 rinsed using 1XPBS containing 0.1 % Tween20 and subsequently re-blocked using the blocking  
523 buffer. The membranes were then probed with secondary antibody for 1 hour at RT in blocking  
524 buffer containing 0.1 % Tween20 (Goat anti-Mouse IgG (H+L) Secondary Antibody, HRP  
525 (Thermo Fisher Scientific, 31430); Goat anti-Rabbit IgG (H+L) Secondary Antibody, HRP  
526 (Thermo Fisher Scientific, 31460); Li-Cor infrared conjugated secondary/ IRDye 800RD Donkey  
527 anti-Rabbit IgG antibody (LI-COR Biosciences, 926-32211) at dilutions of 1:2,000). The  
528 membranes were rinsed to remove any residual blocking buffer using 1X PBS containing 0.1 %  
529 Tween20. If HRP-conjugated secondary antibodies were used, membranes were probed for 5  
530 minutes with clarity Western enhanced chemiluminescence blotting substrate (Bio-Rad) and  
531 visualized with photosensitive film. For LiCOR-secondary antibodies, membranes were visualized  
532 with a LiCOR Odyssey Fc.



533

## 534 **Statistics**

535 Statistical analysis was performed using GraphPad Prism version 9.2.0. Quantified data are  
536 visualized as mean + standard error of the mean. Unpaired student's *t* tests were used for two-  
537 group comparisons. Data affected by one or two factors were analyzed by one-way or two-way  
538 analysis of variance (ANOVA), respectively, followed by Bonferroni *post hoc* comparisons  
539 (unless otherwise stated in the figure legend) when at least one of the main factors or the interaction  
540 was significant. A significance level of 0.05 was accepted for all tests. Asterisks mark *P* values  $\leq$   
541 0.05 (\*),  $\leq 0.01$  (\*\*),  $\leq 0.001$  (\*\*\*), or  $\leq 0.001$  (\*\*\*\*).

542

## 543 **References and Notes**

- 544 1. Selvaraj S, Piramanayagam S. Impact of gene mutation in the development of Parkinson's  
545 disease. *Genes Dis.* 2019;6(2):120–8.
- 546 2. Mhyre TR, Boyd JT, Hamill RW, Maguire-Zeiss KA. Parkinson's disease. *Subcell*  
547 *Biochem.* 2012;65:389–455.
- 548 3. Sveinbjornsdottir S. The clinical symptoms of Parkinson's disease. *J Neurochem.*  
549 2016;139:318–24.
- 550 4. Mazzoni P, Shabbott B, Cortés JC. Motor control abnormalities in Parkinson's disease.  
551 *Cold Spring Harb Perspect Med.* 2012;2(6):1–17.
- 552 5. Berardelli A, Rothwell JC, Thompson PD, Hallett M. Pathophysiology of bradykinesia in  
553 Parkinson's disease. *Brain.* 2001 Nov;124(11):2131–46.
- 554 6. Mor DE, Ischiropoulos H. The Convergence of Dopamine and  $\alpha$ -Synuclein: Implications  
555 for Parkinson's Disease. *J Exp Neurosci.* 2018 Mar;12:1179069518761360–  
556 1179069518761360.
- 557 7. Fujiwara H, Hasegawa M, Dohmae N, Kawashima A, Masliah E, Goldberg MS, et al.  $\alpha$ -  
558 Synuclein is phosphorylated in synucleinopathy lesions. *Nat Cell Biol* [Internet].  
559 2002;4(2):160–4. Available from: <https://doi.org/10.1038/ncb748>
- 560 8. Vázquez-Vélez GE, Gonzales KA, Revelli J-P, Adamski CJ, Alavi Naini F, Bajić A, et al.  
561 Doublecortin-like Kinase 1 Regulates  $\alpha$ -Synuclein Levels and Toxicity. *J Neurosci*  
562 [Internet]. 2020;40(2):459. Available from:  
563 <http://www.jneurosci.org/content/40/2/459.abstract>
- 564 9. Rousseaux MWC, Shulman JM, Jankovic J. Progress toward an integrated understanding  
565 of Parkinson's disease [version 1; peer review: 2 approved]. *F1000Research* [Internet].  
566 2017;6(1121). Available from: <http://openr.es/9uu>
- 567 10. Campêlo CL das C, Silva RH. Genetic Variants in SNCA and the Risk of Sporadic



- 568 Parkinson's Disease and Clinical Outcomes: A Review. *Parkinsons Dis* [Internet].  
569 2017/07/11. 2017;2017:4318416. Available from:  
570 <https://pubmed.ncbi.nlm.nih.gov/28781905>
- 571 11. Singleton AB, Farrer M, Johnson J, Singleton A, Hague S, Kachergus J, et al.  $\alpha$ -Synuclein  
572 Locus Triplication Causes Parkinson's Disease. *Science* (80- ) [Internet].  
573 2003;302(5646):841. Available from:  
574 <http://science.sciencemag.org/content/302/5646/841.abstract>
- 575 12. Gründemann J, Schlaudraff F, Haeckel O, Liss B. Elevated  $\alpha$ -synuclein mRNA levels in  
576 individual UV-laser-microdissected dopaminergic substantia nigra neurons in idiopathic  
577 Parkinson's disease. *Nucleic Acids Res* [Internet]. 2008 Mar 10;36(7):e38–e38. Available  
578 from: <https://doi.org/10.1093/nar/gkn084>
- 579 13. Feany MB, Bender WW. A *Drosophila* model of Parkinson's disease. *Nature* [Internet].  
580 2000;404(6776):394–8. Available from: <https://doi.org/10.1038/35006074>
- 581 14. Masliah E, Rockenstein E, Veinbergs I, Mallory M, Hashimoto M, Takeda A, et al.  
582 Dopaminergic Loss and Inclusion Body Formation in  $\alpha$ -Synuclein Mice: Implications for  
583 Neurodegenerative Disorders. *Science* (80- ) [Internet]. 2000;287(5456):1265. Available  
584 from: <http://science.sciencemag.org/content/287/5456/1265.abstract>
- 585 15. Lakso M, Vartiainen S, Moilanen A-M, Sirviö J, Thomas JH, Nass R, et al. Dopaminergic  
586 neuronal loss and motor deficits in *Caenorhabditis elegans* overexpressing human  $\alpha$ -  
587 synuclein. *J Neurochem* [Internet]. 2003 Jul 1;86(1):165–72. Available from:  
588 <https://doi.org/10.1046/j.1471-4159.2003.01809.x>
- 589 16. Chu Y, Kordower JH. Age-associated increases of  $\alpha$ -synuclein in monkeys and humans  
590 are associated with nigrostriatal dopamine depletion: Is this the target for Parkinson's  
591 disease? *Neurobiol Dis* [Internet]. 2007;25(1):134–49. Available from:  
592 <http://www.sciencedirect.com/science/article/pii/S0969996106002191>
- 593 17. Polymeropoulos MH, Lavedan C, Leroy E, Ide SE, Dehejia A, Dutra A, et al. Mutation in  
594 the alpha-synuclein gene identified in families with Parkinson's disease. *Science*. 1997  
595 Jun;276(5321):2045–7.
- 596 18. Stefanis L.  $\alpha$ -Synuclein in Parkinson's Disease. *Cold Spring Harb Perspect Med*  
597 [Internet]. 2012 Feb 1;2(2). Available from:  
598 <http://perspectivesinmedicine.cshlp.org/content/2/2/a009399.abstract>
- 599 19. Sulzer D, Edwards RH. The physiological role of  $\alpha$ -synuclein and its relationship to  
600 Parkinson's Disease. *J Neurochem* [Internet]. 2019 Sep 1;150(5):475–86. Available from:  
601 <https://doi.org/10.1111/jnc.14810>
- 602 20. Becket G-H, Manuela P, Megumi M-T, Ling D, M. WA, H. NE, et al.  $\alpha\beta\gamma$ -Synuclein  
603 triple knockout mice reveal age-dependent neuronal dysfunction. *Proc Natl Acad Sci*  
604 [Internet]. 2010 Nov 9;107(45):19573–8. Available from:  
605 <https://doi.org/10.1073/pnas.1005005107>
- 606 21. Kokhan VS, Afanasyeva MA, Van'kin GI.  $\alpha$ -Synuclein knockout mice have cognitive  
607 impairments. *Behav Brain Res*. 2012;231(1):226–30.
- 608 22. Rousseaux MWC, Vázquez-Vélez GE, Al-Ramahi I, Jeong H-H, Bajić A, Revelli J-P, et  
609 al. A Druggable Genome Screen Identifies Modifiers of  $\alpha$ -Synuclein Levels via a Tiered  
610 Cross-Species Validation Approach. *J Neurosci* [Internet]. 2018;38(43):9286. Available  
611 from: <http://www.jneurosci.org/content/38/43/9286.abstract>
- 612 23. Shu F, Lv S, Qin Y, Ma X, Wang X, Peng X, et al. Functional characterization of human  
613 PFTK1 as a cyclin-dependent kinase. *Proc Natl Acad Sci U S A* [Internet]. 2007/05/21.

- 614 2007 May 29;104(22):9248–53. Available from:  
615 <https://pubmed.ncbi.nlm.nih.gov/17517622>
- 616 24. Chen L, Wang Y, Jiang W, Ni R, Wang Y, Ni S. CDK14 involvement in proliferation  
617 migration and invasion of esophageal cancer. *Ann Transl Med* [Internet]. 2019  
618 Nov;7(22):681. Available from: <https://pubmed.ncbi.nlm.nih.gov/31930082>
- 619 25. Zhou Y, Rideout WM, Bressel A, Yalavarthi S, Zi T, Potz D, et al. Spontaneous genomic  
620 alterations in a chimeric model of colorectal cancer enable metastasis and guide effective  
621 combinatorial therapy. *PLoS One*. 2014;9(8):1–13.
- 622 26. Ferguson FM, Doctor ZM, Ficarro SB, Browne CM, Marto JA, Johnson JL, et al.  
623 Discovery of Covalent CDK14 Inhibitors with Pan-TAIRE Family Specificity. *Cell Chem*  
624 *Biol* [Internet]. 2019;26(6):804-817.e12. Available from:  
625 <http://www.sciencedirect.com/science/article/pii/S2451945619300704>
- 626 27. Rodríguez González Y, Kamkar F, Jafar-nejad P, Wang S, Qu D, Sanchez Alvarez L, et  
627 al. PFTK1 kinase regulates axogenesis during development via RhoA activation. *bioRxiv*  
628 [Internet]. 2022 Jan 1;2022.01.11.475789. Available from:  
629 <http://biorxiv.org/content/early/2022/03/10/2022.01.11.475789.abstract>
- 630 28. Luk KC, Kehm V, Carroll J, Zhang B, O'Brien P, Trojanowski JQ, et al. Pathological  $\alpha$ -  
631 Synuclein Transmission Initiates Parkinson-like Neurodegeneration in Nontransgenic  
632 Mice. *Science* (80- ) [Internet]. 2012;338(6109):949. Available from:  
633 <http://science.sciencemag.org/content/338/6109/949.abstract>
- 634 29. Mao X, Ou MT, Karuppagounder SS, Kam T-I, Yin X, Xiong Y, et al. Pathological  $\alpha$ -  
635 synuclein transmission initiated by binding lymphocyte-activation gene 3. *Science*  
636 [Internet]. 2016 Sep 30;353(6307):aah3374. Available from:  
637 <https://pubmed.ncbi.nlm.nih.gov/27708076>
- 638 30. Kam T-I, Mao X, Park H, Chou S-C, Karuppagounder SS, Umanah GE, et al. Poly(ADP-  
639 ribose) drives pathologic  $\alpha$ -synuclein neurodegeneration in Parkinson's disease. *Science*  
640 [Internet]. 2018 Nov 2;362(6414):eaat8407. Available from:  
641 <https://pubmed.ncbi.nlm.nih.gov/30385548>
- 642 31. Rockenstein E, Mallory M, Hashimoto M, Song D, Shults CW, Lang I, et al. Differential  
643 neuropathological alterations in transgenic mice expressing  $\alpha$ -synuclein from the platelet-  
644 derived growth factor and Thy-1 promoters. *J Neurosci Res*. 2002 Jun;68(5):568–78.
- 645 32. Chesselet M-F, Richter F, Zhu C, Magen I, Watson MB, Subramaniam SR. A progressive  
646 mouse model of Parkinson's disease: the Thy1-aSyn ("Line 61") mice. *Neurotherapeutics*  
647 [Internet]. 2012;9(2):297–314. Available from:  
648 <https://pubmed.ncbi.nlm.nih.gov/22350713>
- 649 33. Matsuura K, Kabuto H, Makino H, Ogawa N. Pole test is a useful method for evaluating  
650 the mouse movement disorder caused by striatal dopamine depletion. *J Neurosci Methods*  
651 [Internet]. 1997;73(1):45–8. Available from:  
652 <https://www.sciencedirect.com/science/article/pii/S016502709602211X>
- 653 34. Sedelis M, Schwarting RKW, Huston JP. Behavioral phenotyping of the MPTP mouse  
654 model of Parkinson's disease. *Behav Brain Res* [Internet]. 2001;125(1):109–25. Available  
655 from: <https://www.sciencedirect.com/science/article/pii/S0166432801003096>
- 656 35. Dhungel N, Eleuteri S, Li L, Kramer NJ, Chartron JW, Spencer B, et al. Parkinson's  
657 Disease Genes VPS35 and EIF4G1 Interact Genetically and Converge on  $\alpha$ -Synuclein.  
658 *Neuron* [Internet]. 2015;85(1):76–87. Available from:  
659 <https://www.sciencedirect.com/science/article/pii/S0896627314010812>

- 660 36. Rousseaux MWC, de Haro M, Lasagna-Reeves CA, De Maio A, Park J, Jafar-Nejad P, et  
661 al. TRIM28 regulates the nuclear accumulation and toxicity of both alpha-synuclein and  
662 tau. *Ackerman SL, editor. Elife [Internet]. 2016;5:e19809. Available from:*  
663 <https://doi.org/10.7554/eLife.19809>
- 664 37. Rockenstein E, Clarke J, Viel C, Panarello N, Treleaven CM, Kim C, et al.  
665 Glucocerebrosidase modulates cognitive and motor activities in murine models of  
666 Parkinson's disease. *Hum Mol Genet [Internet]. 2016 Jul 1;25(13):2645–60. Available*  
667 *from: <https://doi.org/10.1093/hmg/ddw124>*
- 668 38. Soldner F, Laganière J, Cheng AW, Hockemeyer D, Gao Q, Alagappan R, et al.  
669 Generation of Isogenic Pluripotent Stem Cells Differing Exclusively at Two Early Onset  
670 Parkinson Point Mutations. *Cell [Internet]. 2011;146(2):318–31. Available from:*  
671 <https://www.sciencedirect.com/science/article/pii/S0092867411006611>
- 672 39. Bhullar KS, Lagarón NO, McGowan EM, Parmar I, Jha A, Hubbard BP, et al. Kinase-  
673 targeted cancer therapies: progress, challenges and future directions. *Mol Cancer*  
674 *[Internet]. 2018 Feb 19;17(1):48. Available from:*  
675 <https://pubmed.ncbi.nlm.nih.gov/29455673>
- 676 40. Gouda NA, Elkamhawy A, Cho J. Emerging Therapeutic Strategies for  
677 Parkinson's Disease and Future Prospects: A 2021 Update. Vol. 10, *Biomedicines .*  
678 *2022.*
- 679 41. Tomlinson JJ, Shutinoski B, Dong L, Meng F, Elleithy D, Lengacher NA, et al.  
680 Holocranohistochemistry enables the visualization of  $\alpha$ -synuclein expression in the murine  
681 olfactory system and discovery of its systemic anti-microbial effects. *J Neural Transm*  
682 *[Internet]. 2017;124(6):721–38. Available from: [https://doi.org/10.1007/s00702-017-](https://doi.org/10.1007/s00702-017-1726-7)*  
683 *1726-7*
- 684 42. L. BE, Aaron M, D. SK, S. BK, Mastooreh C, E. MT, et al. Alpha-Synuclein Expression  
685 Restricts RNA Viral Infections in the Brain. *J Virol [Internet]. 2022 May 2;90(6):2767–*  
686 *82. Available from: <https://doi.org/10.1128/JVI.02949-15>*
- 687 43. Allen Reish HE, Standaert DG. Role of  $\alpha$ -synuclein in inducing innate and adaptive  
688 immunity in Parkinson disease. *J Parkinsons Dis [Internet]. 2015;5(1):1–19. Available*  
689 *from: <https://pubmed.ncbi.nlm.nih.gov/25588354>*
- 690 44. Rousseaux MWC, Revelli J-P, Vázquez-Vélez GE, Kim J-Y, Craigen E, Gonzales K, et  
691 al. Depleting Trim28 in adult mice is well tolerated and reduces levels of  $\alpha$ -synuclein and  
692 tau. *Ackerman SL, editor. Elife [Internet]. 2018;7:e36768. Available from:*  
693 <https://doi.org/10.7554/eLife.36768>
- 694 45. Karczewski KJ, Francioli LC, Tiao G, Cummings BB, Alföldi J, Wang Q, et al. The  
695 mutational constraint spectrum quantified from variation in 141,456 humans. *Nature*  
696 *[Internet]. 2020;581(7809):434–43. Available from: [https://doi.org/10.1038/s41586-020-](https://doi.org/10.1038/s41586-020-2308-7)*  
697 *2308-7*
- 698 46. Volpicelli-Daley LA, Luk KC, Patel TP, Tanik SA, Riddle DM, Stieber A, et al.  
699 Exogenous  $\alpha$ -synuclein fibrils induce Lewy body pathology leading to synaptic  
700 dysfunction and neuron death. *Neuron [Internet]. 2011 Oct 6;72(1):57–71. Available*  
701 *from: <https://pubmed.ncbi.nlm.nih.gov/21982369>*
- 702 47. Polinski NK, Volpicelli-Daley LA, Sortwell CE, Luk KC, Cremades N, Gottler LM, et al.  
703 Best Practices for Generating and Using Alpha-Synuclein Pre-Formed Fibrils to Model  
704 Parkinson's Disease in Rodents. *J Parkinsons Dis [Internet]. 2018;8(2):303–22. Available*  
705 *from: <https://pubmed.ncbi.nlm.nih.gov/29400668>*

- 706 48. Deacon R. Assessing burrowing, nest construction, and hoarding in mice. *J Vis Exp*  
707 [Internet]. 2012 Jan 5;(59):e2607–e2607. Available from:  
708 <https://pubmed.ncbi.nlm.nih.gov/22258546>
- 709 49. Ryan SD, Dolatabadi N, Chan SF, Zhang X, Akhtar MW, Parker J, et al. Isogenic Human  
710 iPSC Parkinson’s Model Shows Nitrosative Stress-Induced Dysfunction in MEF2-PGC1 $\alpha$   
711 Transcription. *Cell* [Internet]. 2013;155(6):1351–64. Available from:  
712 <http://www.sciencedirect.com/science/article/pii/S0092867413014220>
- 713 50. Kriks S, Shim J-W, Piao J, Ganat YM, Wakeman DR, Xie Z, et al. Dopamine neurons  
714 derived from human ES cells efficiently engraft in animal models of Parkinson’s disease.  
715 *Nature* [Internet]. 2011;480(7378):547–51. Available from:  
716 <https://doi.org/10.1038/nature10648>
- 717 51. Bojan S, Mansoureh H, E. HI, Michaela L, Juliana R, Nathalie L, et al. Lrrk2 alleles  
718 modulate inflammation during microbial infection of mice in a sex-dependent manner. *Sci*  
719 *Transl Med* [Internet]. 2019 Sep 25;11(511):eaas9292. Available from:  
720 <https://doi.org/10.1126/scitranslmed.aas9292>
- 721 52. Volpicelli-Daley LA, Luk KC, Lee VM-Y. Addition of exogenous  $\alpha$ -synuclein preformed  
722 fibrils to primary neuronal cultures to seed recruitment of endogenous  $\alpha$ -synuclein to  
723 Lewy body and Lewy neurite-like aggregates. *Nat Protoc* [Internet]. 2014;9(9):2135–46.  
724 Available from: <https://doi.org/10.1038/nprot.2014.143>  
725

## 726 **Acknowledgments:**

727 The authors thank Drs. Robert Rissman (UCSD), Eliezer Masliah (UCSD/NIA) and David Park  
728 (University of Calgary) for sharing the mutant mice used in this study. We thank Dr. G. Vázquez-  
729 Vélez (Washington University) for his critical appraisal of the manuscript. The authors also thank  
730 the following Core facilities from the University of Ottawa and the Ottawa Hospital Research  
731 Institute for use of their facility, equipment, and expertise: Animal Behaviour and Physiology  
732 Core, Cell Biology and Imaging Acquisition Core, StemCore Laboratories and Louise Pelletier  
733 Histology Core. Schemes were generated using biorender (<https://biorender.com/>).

## 734 **Funding:**

735 Parkinson’s Foundation-APDA Summer Student Fellowship PF-APDA-SFW-1919,  
736 Parkinson Research Consortium (PRC) Summer Studentship, University of Ottawa  
737 Faculty of Medicine, Office of Francophones Affairs Scholarship. (JLAP)  
738 Parkinson Research Consortium (PRC) Larry Haffner Fellowship, Parkinson Canada  
739 Basic Research Fellowship BRF-2021-0000000048. (KMR)  
740 Parkinson’s Research Consortium (PRC) Bonnie and Don Poole Fellowship, Ontario  
741 Graduate Scholarship, Queen Elizabeth II Scholarship. (HMG)

742 Canadian Institutes of Health Research (FRN-153188). (WLS)  
743 Vanier Canada. (MGS)  
744 Parkinson's Society of Southwestern Ontario (PSSO). (BBD)  
745 Canadian Institutes of Health Research (FRN-159443). (SDR)  
746 Parkinson's Foundation Stanley Fahn Junior Faculty Award (PF-JFA-1762), Canadian  
747 Institutes of Health Research (PJT-169097), the Parkinson Canada New Investigator  
748 Award (2018-00016), Aligning Science Across Parkinson's (ASAP-020625) through the  
749 Michael J. Fox Foundation for Parkinson's Research (MJFF). (MWCR)

750

751 **Author contributions:**

752 Conceptualization: JLAP, KMR, MWCR  
753 Methodology: JLAP, KMR, MS, BBD, EL, BN, NAL, HMG, AB, MGS, BBD, SMC,  
754 MWCR  
755 Investigation: JLAP, KMR, MS, BBD, HMG, SMC, MWCR  
756 Supervision: WLS, MGS, SDR, MWCR  
757 Writing – original draft: JLAP, KMR, MWCR  
758 Writing – review & editing: JLAP, KMR, JJT, MGS, WLS, PB, SDR, MWCR  
759 Resources: AJ, PB

760

761 **Competing interests:**

762 The authors declare that they have no conflict of interest.

763

764 **Data and materials availability:**

765 All data of this study are in the main text or in the Supplementary Materials. Cdk14<sup>+/-</sup> and Cdk14<sup>-</sup>  
766 <sup>-</sup> mice were obtained from David Park from the University of Calgary and are on an F14  
767 C57BL/6N background. mThy1-SNCA “line 61” (*α-Syn TG*) mice were obtained from Robert  
768 Rissman from the University of California, San Diego. Mouse *α-Syn* PFF preparations were  
769 provided by Patrik Brundin, Van Andel Institute, Grand Rapids. Any other materials are  
770 commercially available.

771

772



773 **Figures**

774 **Figure 1. Loss of Cdk14 ameliorates motor impairment and  $\alpha$ -Syn pathology in PFF-injected**  
775 **mice.** (A) Mouse  $\alpha$ -Syn PFFs were injected unilaterally to the striatum by stereotactic injection in  
776 6-month-old mice. (B) Loss of forelimb grip strength at 6 months post  $\alpha$ -Syn PFF-treatment in  
777 WT mice, but not in *Cdk14*<sup>+/-</sup>- or *Cdk14*<sup>-/-</sup>-mice. Two-way ANOVA, Bonferroni *post hoc*, n: 9-10.  
778 (C)  $\alpha$ -Syn PFF-injection increased the load of pS129  $\alpha$ -Syn-positive cells (depicted without and  
779 with hematoxylin counterstaining, 50  $\mu$ m scale bars) in the injected hemisphere (ipsilateral, IL).  
780 Densities of pS129  $\alpha$ -Syn-positive cells are depicted in heat maps as hues of red at 3 rostrocaudal  
781 levels (relative to bregma: +0.98 mm, +0.26 mm, and -1.34 mm) with dark shades of red  
782 correlating to high cell densities. Amounts of pS129  $\alpha$ -Syn-positive cells in all brain regions  
783 (averaged) and the somatomotor cortex at +0.26 mm relative to bregma of PFF-injected *Cdk14*<sup>+/-</sup>-  
784 - and *Cdk14*<sup>-/-</sup>- mice were lower relative to their wildtype (WT) counterparts. Two-way ANOVA,  
785 Bonferroni *post hoc* comparisons, n: 3-6.

786

787 **Figure 2. Cdk14 modulates PD-like behavior and regulates  $\alpha$ -Syn levels in mice**  
788 **overexpressing human  $\alpha$ -Syn.** (A) Breeding strategy to obtain  *$\alpha$ -Syn TG; Cdk14*<sup>+/-</sup>-mice. (B)  
789 Elevated turn latencies during pole test experiments were observed in  *$\alpha$ -Syn TG-*, but not in  *$\alpha$ -Syn*  
790 *TG; Cdk14*<sup>+/-</sup>-mice. Two-way ANOVA, Bonferroni *post hoc* comparisons. (C)  *$\alpha$ -Syn TG-* and  *$\alpha$ -*  
791 *Syn TG; Cdk14*<sup>+/-</sup>-mice display similar hyperactive locomotion in beam break experiments when  
792 compared to WT mice. Repeated measures two-way ANOVA, Bonferroni *post hoc* comparisons.  
793 (D) Nest building quality is similarly reduced in 3-month-old  *$\alpha$ -Syn TG-* and  *$\alpha$ -Syn TG; Cdk14*<sup>+/-</sup>-  
794 mice. Two-way ANOVA, Bonferroni *post hoc* comparisons, n: 15-19. (E) Immunoblots depicting  
795 the levels of pS129  $\alpha$ -Syn, total  $\alpha$ -Syn, Cdk14, and GAPDH in the NETN buffer-soluble and -

796 insoluble protein fraction of mouse hemibrains. Brains of *Cdk14*<sup>+/-</sup>-mice contain less total  $\alpha$ -Syn  
797 than brains of WT mice. Partial ablation of *Cdk14* in  $\alpha$ -Syn *TG* results in elevated levels of pS129  
798  $\alpha$ -Syn in the soluble fraction and decreased total  $\alpha$ -Syn levels in the insoluble fraction. Unpaired  
799 student's *t* tests, n:5-7.

800

801 **Figure 3. Genetic reduction of Cdk14 prevents neuron loss in  $\alpha$ -Syn *TG* mice and mildens  $\alpha$ -**  
802 **Syn pathology in human neurons.** Immunofluorescence staining for NeuN in the Ca3 region of  
803 the hippocampus (A, 200  $\mu$ m scale bar) and layer V of the cortex (B, 100  $\mu$ m scale bar) visualize  
804 reduced neuronal densities in  $\alpha$ -Syn *TG* mice which is not observed in  $\alpha$ -Syn *TG*; *Cdk14*<sup>+/-</sup>-mice.  
805 Two-way ANOVA, Bonferroni *post hoc* comparisons, n=5. (C) Immunoblots illustrating elevated  
806 amounts of pS129  $\alpha$ -Syn in hiPSC-derived *SNCA* A53T human neurons (in comparison to isogenic  
807 corrected neurons [Corr]) which is reduced by CRISPR/Cas9-mediated knockdown of *CDK14*  
808 (targeted against *CDK14* exon 3 (E3) and 8 (E8)). One-way ANOVA, Tukey *post hoc*  
809 comparisons, n=3-4.

810

811 **Figure 4. Pharmacological inhibition of CDK14 reduces  $\alpha$ -Syn protein burdens in human**  
812 **and rodent neurons.** (A) Application of 500 nM of the CDK14 inhibitor FMF-04-159-2 for 18  
813 hours to HEK293T cells decreases CDK14 and  $\alpha$ -Syn levels, as shown by immunoblots. Unpaired  
814 student's *t* tests, n=6. (B) Dose-dependent reduction of  $\alpha$ -Syn in hESC-derived human neurons is  
815 detected by ELISA quantification after 72 hours of CDK14 inhibitor treatment. One-way ANOVA,  
816 Bonferroni *post hoc* comparisons, n=3. (C) Human  $\alpha$ -Syn PFFs applied to rat cortical neurons  
817 increase the amount of  $\alpha$ -Syn, as shown by immunoblots, which was reduced by the application of

818 100 nM of the CDK14 inhibitor for 5 days. Repeated measures one-way ANOVA, followed by  
819 Holm-Šídák *post hoc* comparisons, n=3.



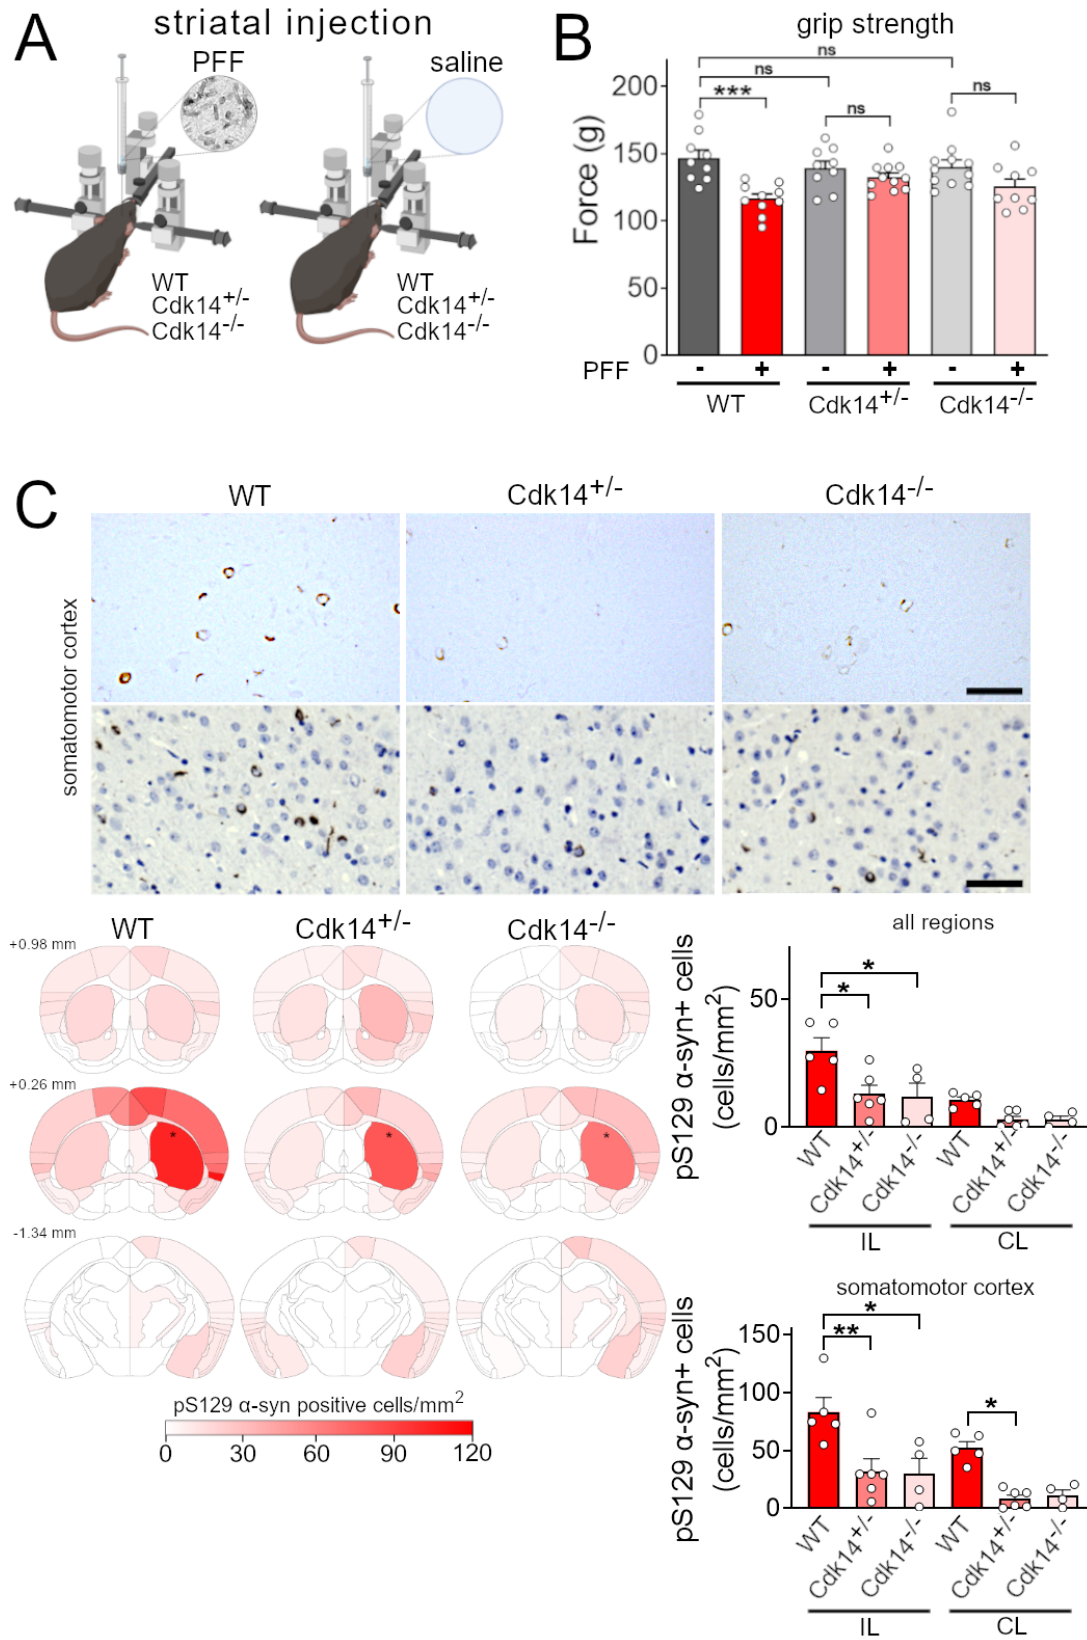

820

821 **Fig. 1**

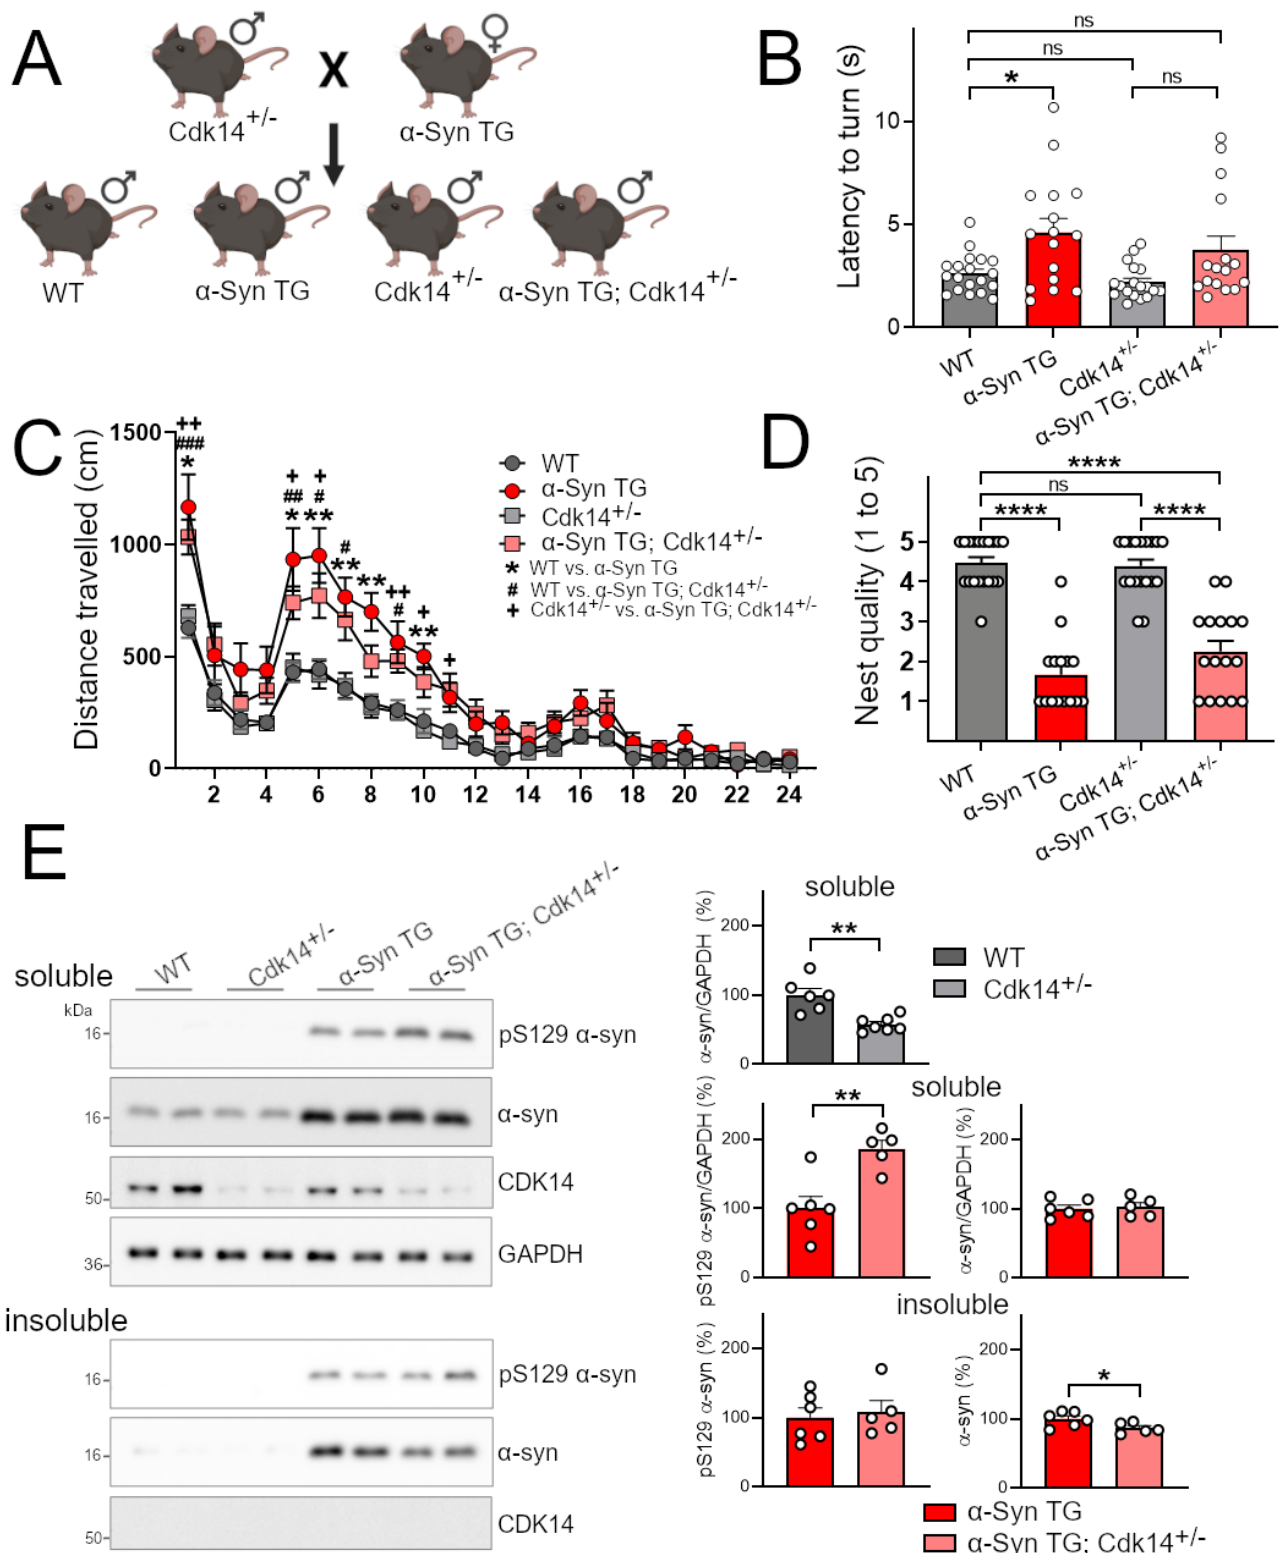

822

823 **Fig. 2**

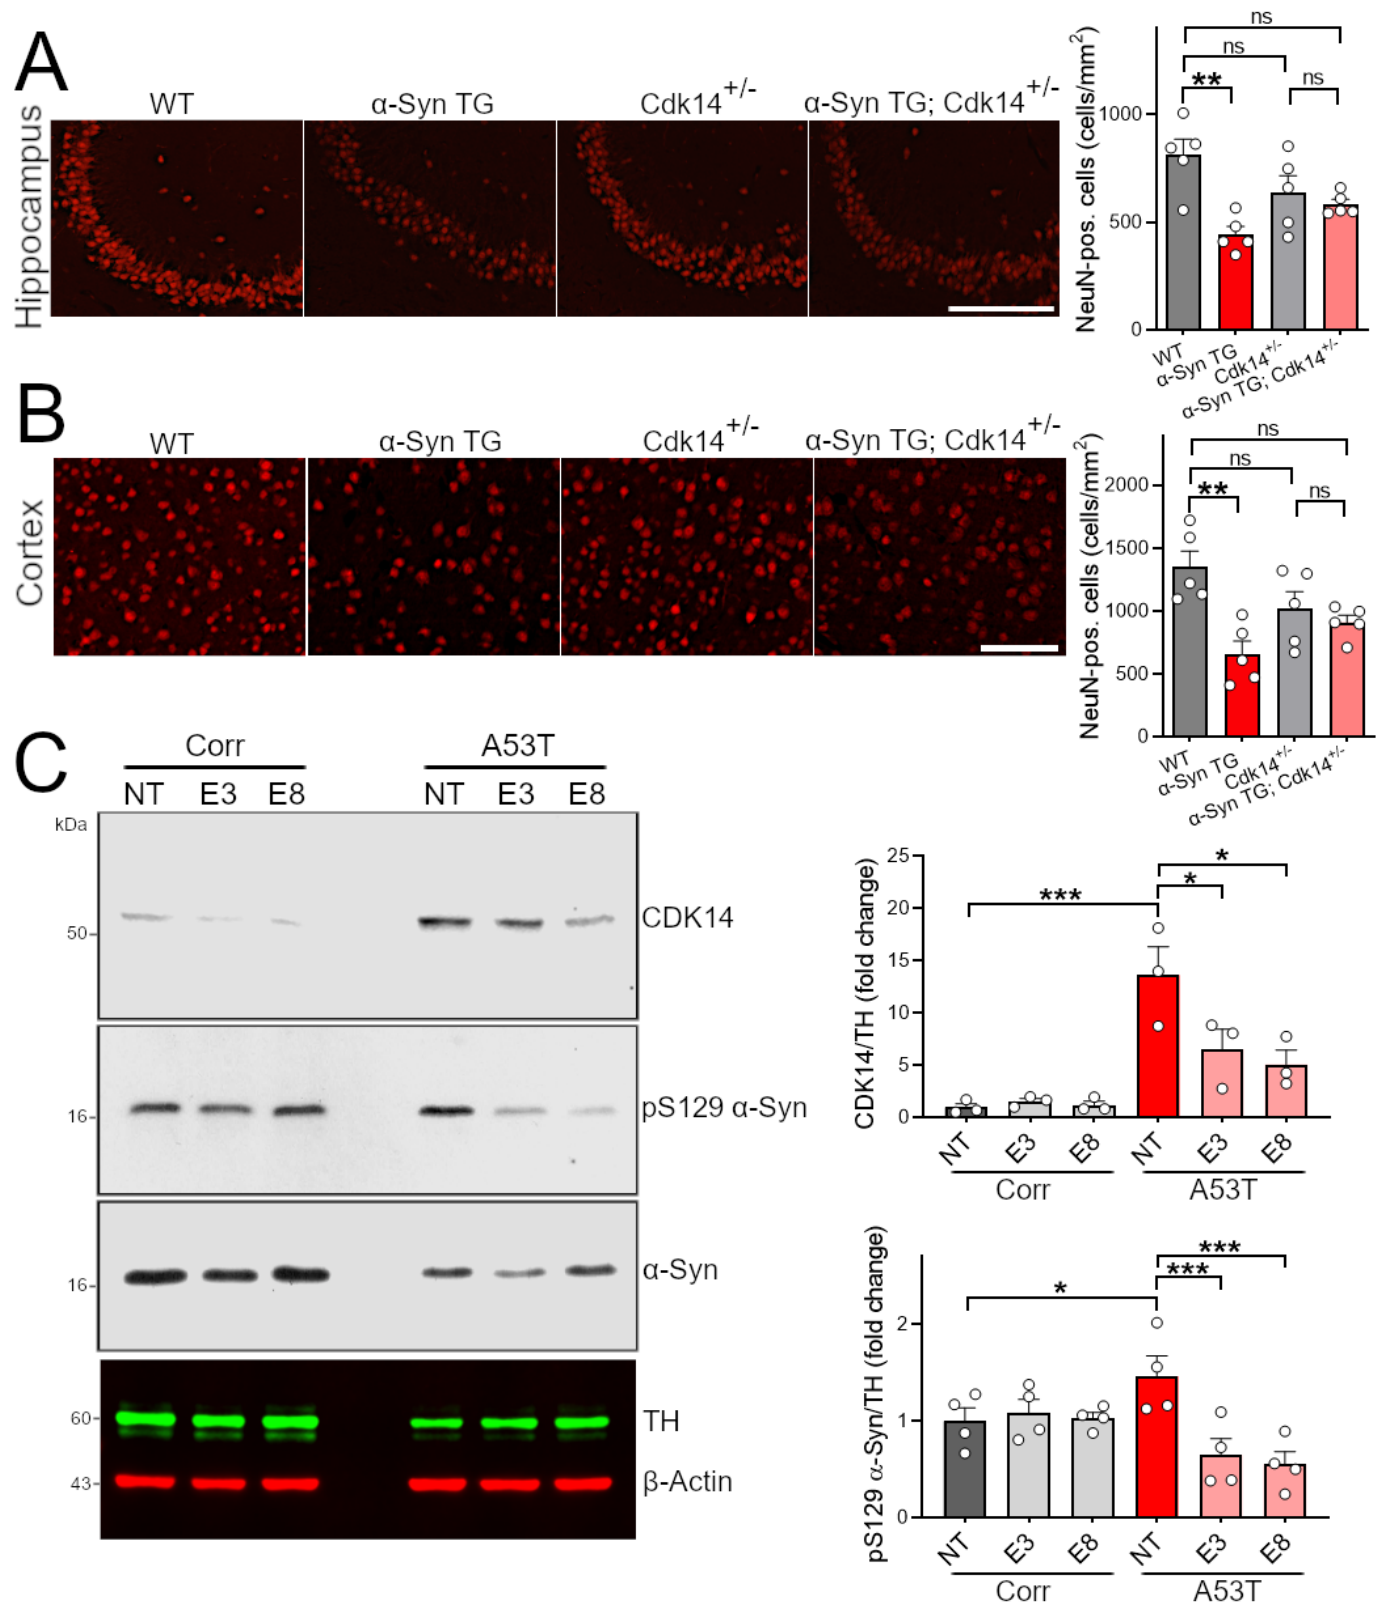

824

825 **Fig. 3**

826

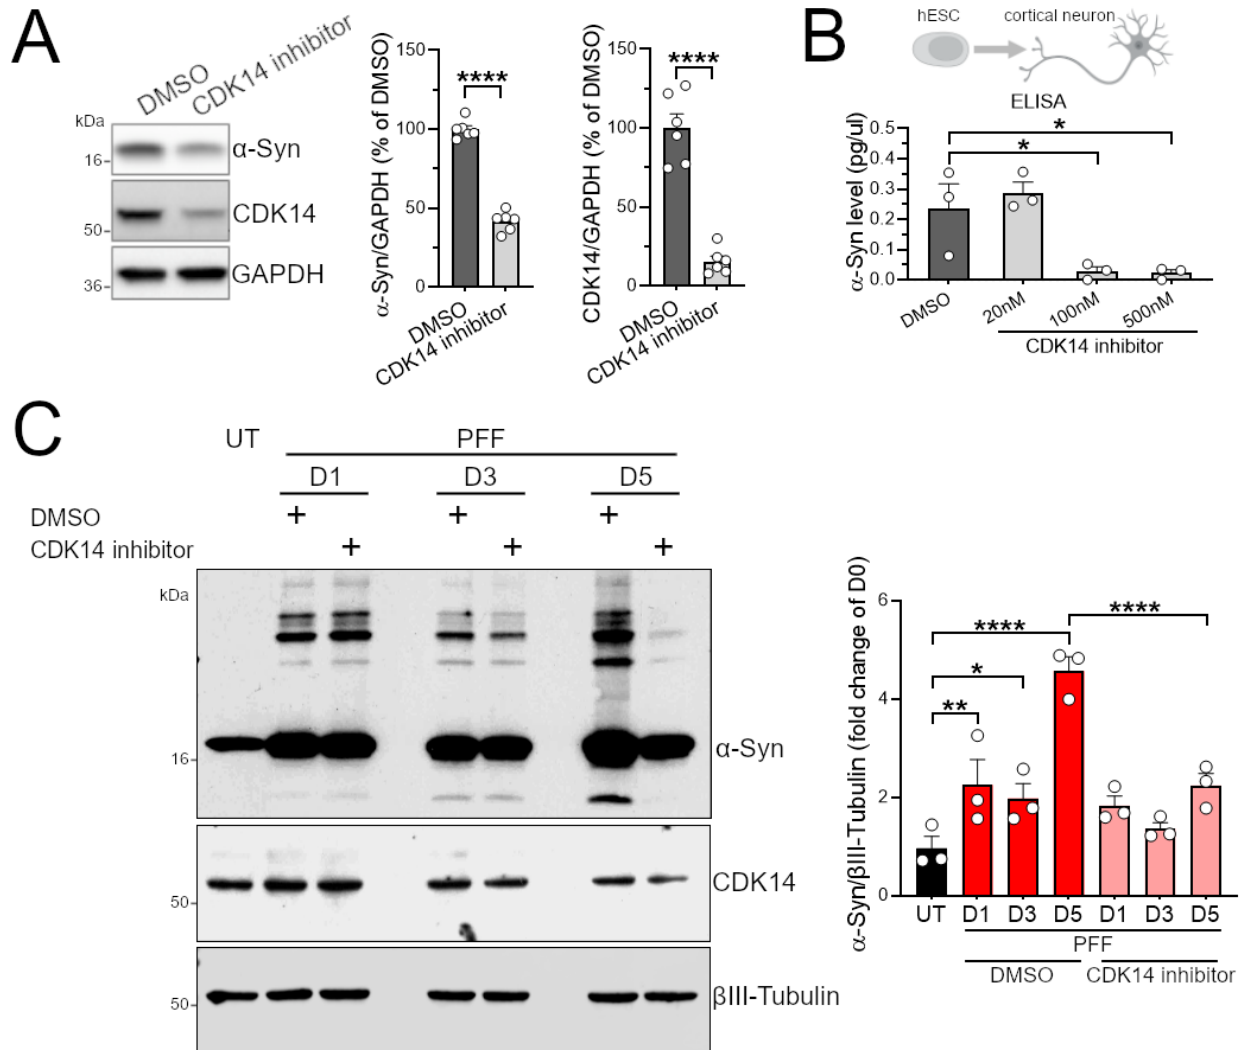

827

828 **Fig. 4**

829

830 **Supplementary Materials**

831

832 **Figure S1. Cdk14 protein levels in mouse organs and mouse  $\alpha$ -Syn PFF characterization. (A)**

833 Immunoblots depicting Cdk14 protein from different organs of *Cdk14*<sup>-/-</sup> and WT-mice. (B)

834 Transmission electron micrograph (500 nm scale) illustrating mouse  $\alpha$ -Syn PFFs used for  
835 intrastriatal injections and corresponding  $\alpha$ -Syn PFF length analysis.

836

837 **Figure S2. Behavioral profile and dopaminergic striatal fiber density of PFF injected *Cdk14***

838 <sup>-/-</sup>-mice. (A) 12-month-old *Cdk14*<sup>+/-</sup> and *Cdk14*<sup>-/-</sup> mice do not display altered behavior in the

839 nesting, tail suspension, elevated plus maze, Y maze, open field, hanging wire, pole (two-way

840 ANOVA, Bonferroni *post hoc* comparisons) and rotarod test (repeated measures two-way

841 ANOVA, Bonferroni *post hoc* comparisons, n:9-10). PFF treatment does not result in significant

842 changes of behavior at 6 months post injection. (B) PFF injection does not change striatal tyrosine

843 hydroxylase (TH)-positive fiber density in the ipsilateral side (IL) in comparison to the non-

844 injected, contralateral side (CL) at bregma 0.26 mm (200  $\mu$ m scale). Two-way ANOVA,

845 Bonferroni *post hoc* comparisons, n: 3-7.

846

847 **Figure S3. Histopathology in  $\alpha$ -Syn TG; *Cdk14*<sup>+/-</sup>-mice and  $\alpha$ -Syn protein levels in rat**

848 **primary neurons. (A)** Cortical pS129  $\alpha$ -Syn signal intensities do not differ between  $\alpha$ -Syn TG-

849 and  $\alpha$ -Syn TG; *Cdk14*<sup>+/-</sup>-mice (200  $\mu$ m scale). Two-way ANOVA, Bonferroni *post hoc*

850 comparisons, n=4-5. (B)  $\alpha$ -Syn TG- and  $\alpha$ -Syn TG; *Cdk14*<sup>+/-</sup>-mice display similar degrees of

851 astrogliosis in the hippocampus, visualized by GFAP staining (200  $\mu$ m scale). Two-way ANOVA,

852 Bonferroni *post hoc* comparisons, n=5. (C) For protein degradation experiments, HEK293T cells

853 were treated with 500 nM FMF-04-159-2, 1  $\mu$ M MG-132 and 200 nM Bafilomycin A1 for 18  
854 hours. Activity of the ubiquitin proteasome system and autophagy is visualized with immunoblots  
855 by Ubiquitin and LC3B, respectively. Two-way ANOVA, Bonferroni *post hoc* comparisons, n=3.  
856 Application of 500 nM of FMF-04-159-2 for 18 hours to HEK293T cells decreases *SNCA*  
857 transcript levels, quantified by qPCR. Unpaired student's *t* tests, n=6. (D) Rat cortical neurons  
858 treated with  $\alpha$ -Syn monomers do not present with elevated amounts of  $\alpha$ -Syn monomers. Repeated  
859 measures one-way ANOVA, followed by Holm-Šídák *post hoc* comparisons, n=3.  
860



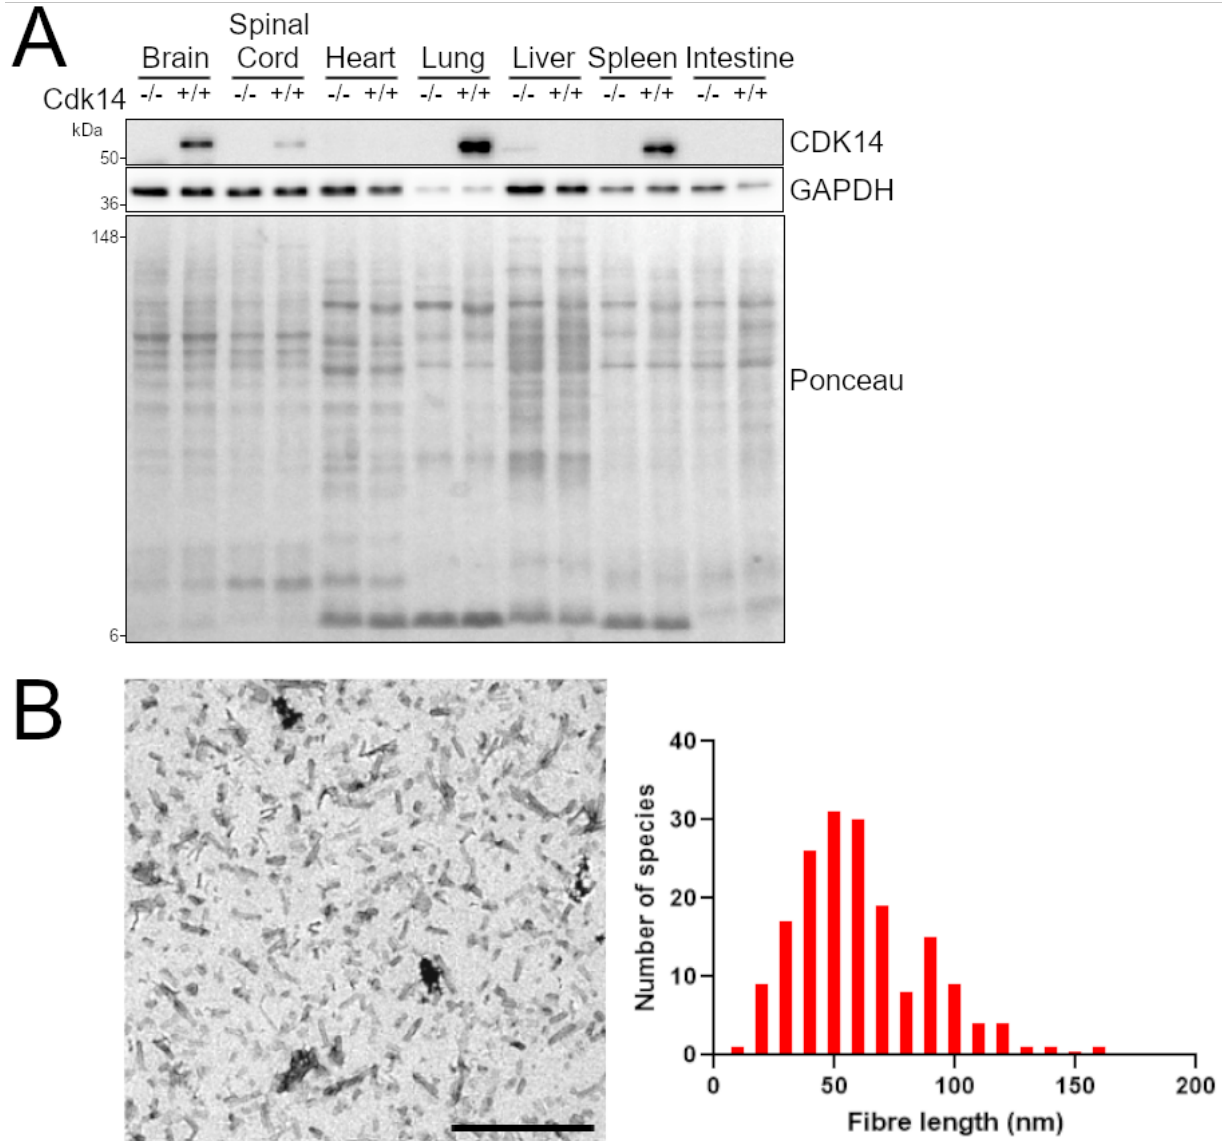

861

862 **Fig. S1.**

863

864

865

866

867

868

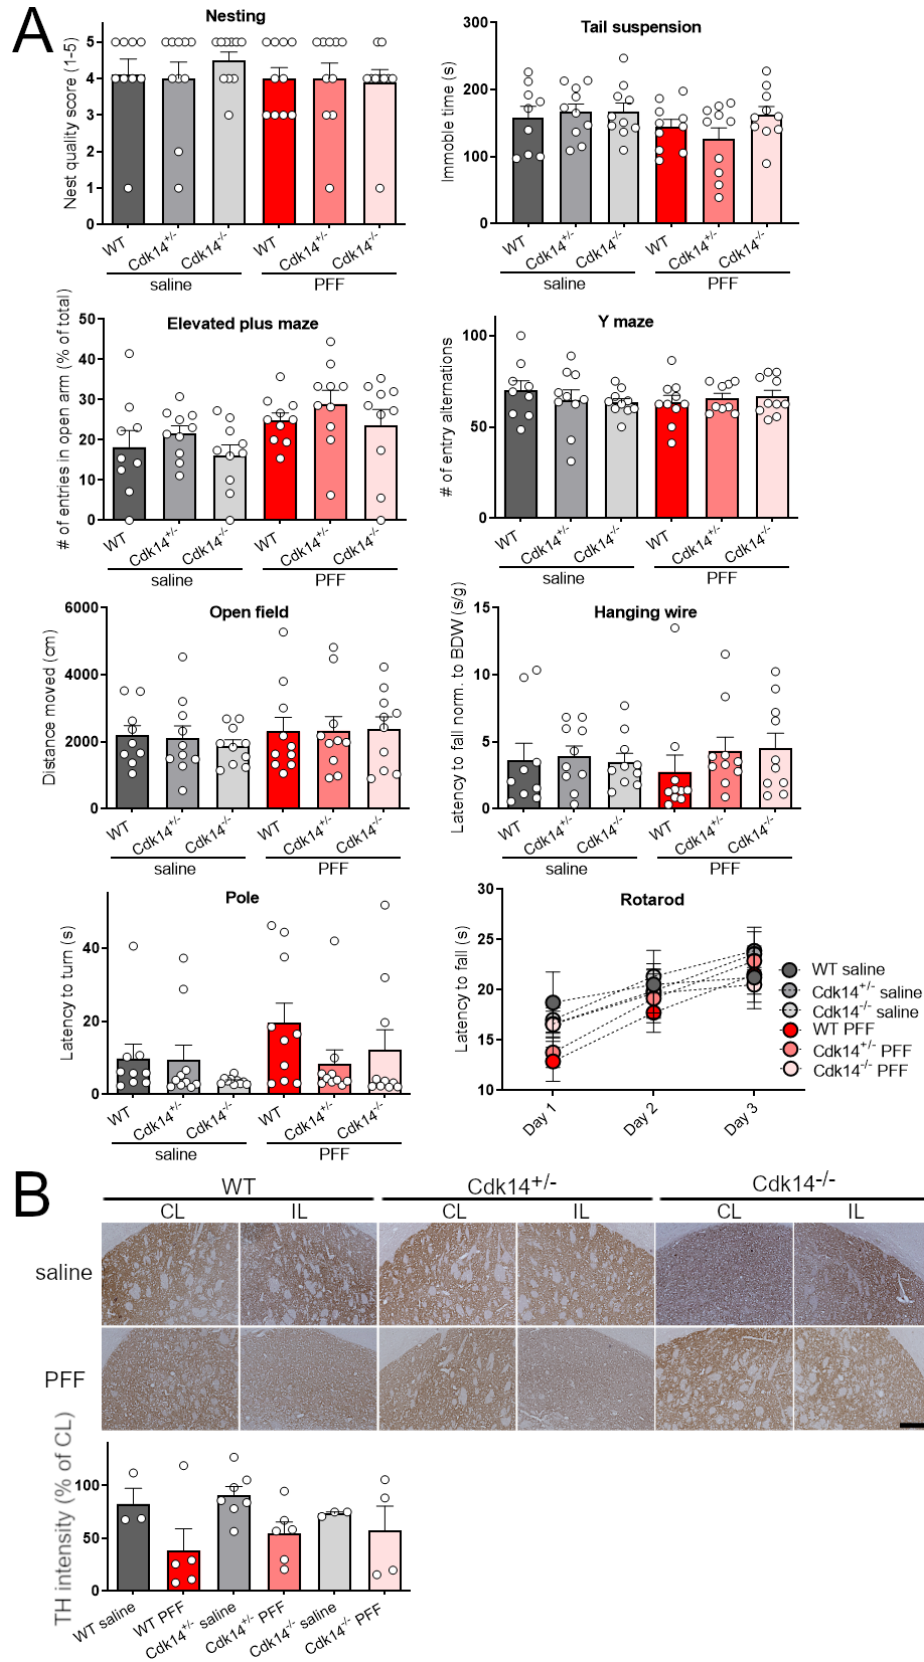

869

870 **Fig. S2**



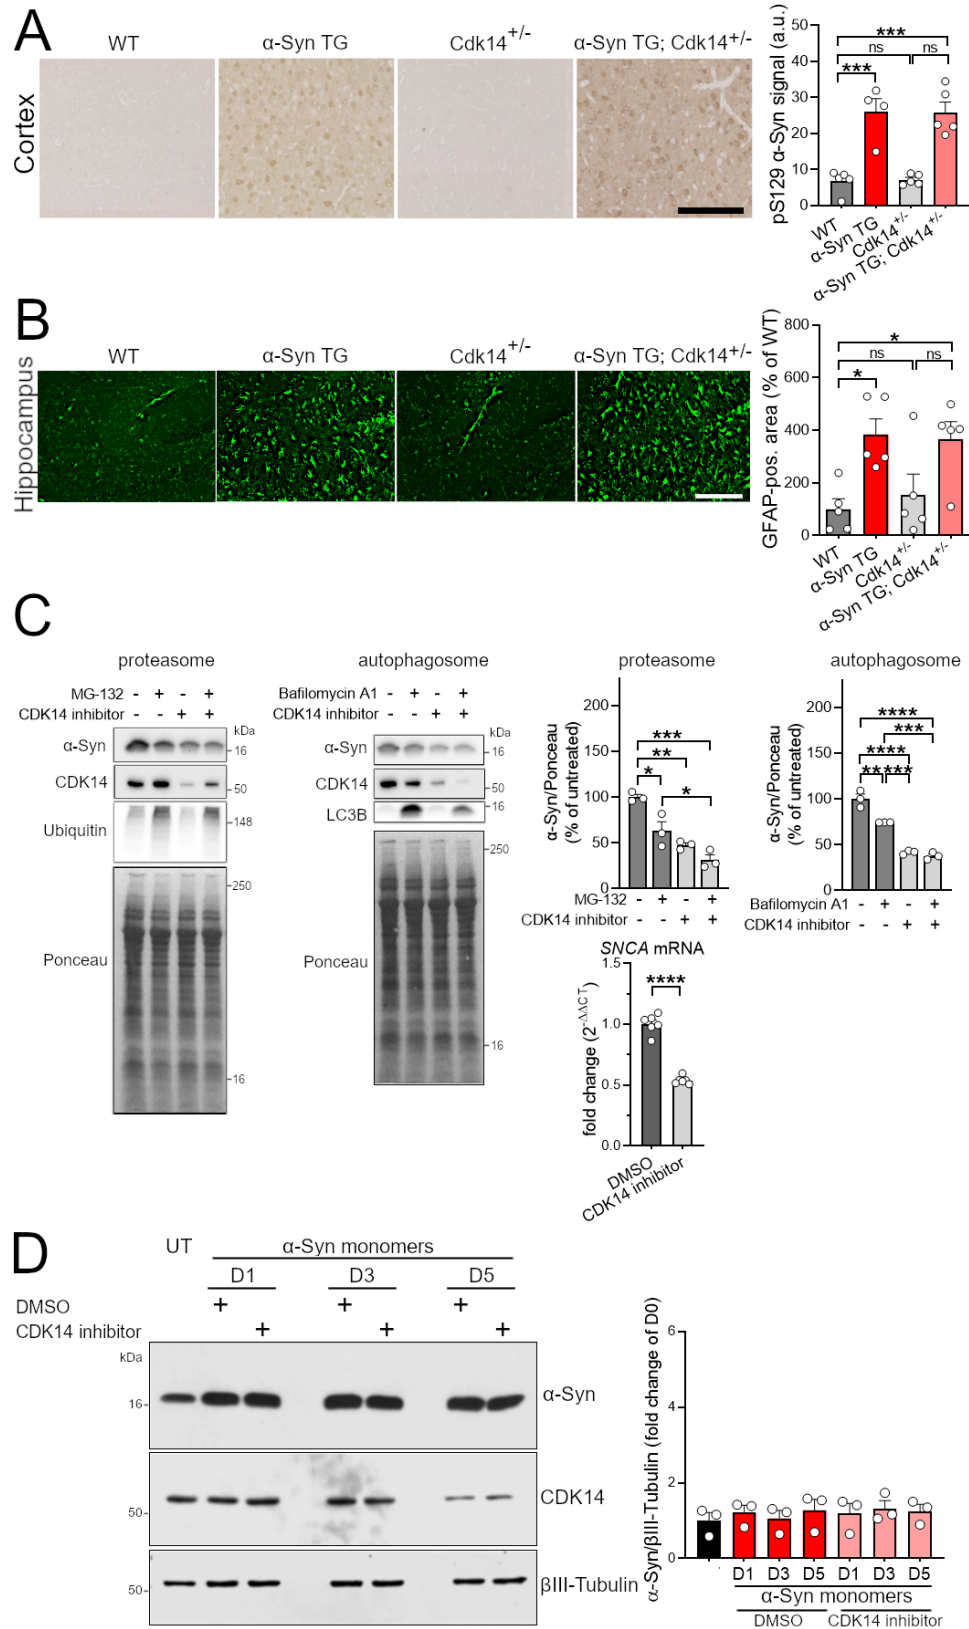

871

872 **Fig. S3**
